# Supplementary material for: Association of Early Pregnancy Perfluoroalkyl and Polyfluoroalkyl Substance Exposure With Birth Outcomes
Source: PubMed Central journal article supplement (PMC10233420; doi:10.1001/jamanetworkopen.2023.14934), 2023-05-31
Supplement: jamanetwopen-e2314934-s001.pdf [file jamanetwopen-e2314934-s001.pdf]

## Supplementary Online Content

Zhang Y, Mustieles V, Sun Q, et al. Association of early pregnancy perfluoroalkyl and polyfluoroalkyl substance exposure with birth outcomes. *JAMA Netw Open*. 2023;6(5):e2314934. doi:10.1001/jamanetworkopen.2023.14934

**eTable 1.** Characteristics Across the Original Project Viva Cohort (N=2128), the Study Population (N=1400), and the Subpopulation (n=898)

**eTable 2.** Distributions of Early Pregnancy Plasma Concentrations of Per- and Polyfluoroalkyl Substances in the Study Population and by Quartiles of Early Pregnancy Dietary Folate Intake Among Mother-Singleton Pairs in Project Viva

**eTable 3.** Distributions of Early Pregnancy Plasma Concentrations of Per- and Polyfluoroalkyl Substances in the Study Population and by Quartiles of Early Pregnancy Plasma Folate Concentrations Among Mother-Singleton Pairs in Project Viva

**eTable 4.** Differences (95% CI) in Birthweight (Grams) per Doubling of Early Pregnancy Plasma Concentrations of Per- and Polyfluoroalkyl Substances Across Quartile Groups by Early Pregnancy Dietary Folate Intake or Plasma Folate Concentrations Among Mother-Singleton Pairs in Project Viva

**eTable 5.** Differences (95% CI) in Birthweight z Score per Doubling of Early Pregnancy Plasma Concentrations of Per- and Polyfluoroalkyl Substances Across Quartile Groups by Early Pregnancy Dietary Folate Intake or Plasma Folate Concentrations Among Mother-Singleton Pairs in Project Viva

**eTable 6.** Differences (95% CI) in Gestational Age per Doubling of Early Pregnancy Plasma Concentrations of Per- and Polyfluoroalkyl Substances Across Quartile Groups by Early Pregnancy Dietary Folate Intake or Plasma Folate Concentrations Among Mother-Singleton Pairs in Project Viva

**eTable 7.** Odds Ratios (95% CI) for Low Birthweight per Doubling of Early Pregnancy Plasma Concentrations of Per- and Polyfluoroalkyl Substances Across Quartile Groups by Early Pregnancy Dietary Folate Intake or Plasma Folate Concentrations Among Mother-Singleton Pairs in Project Viva

**eTable 8.** Odds Ratios (95% CI) for Preterm Birth per Doubling of Early Pregnancy Plasma Concentrations of Per- and Polyfluoroalkyl Substances Across Quartile Groups by Early Pregnancy Dietary Folate Intake or Plasma Folate Concentrations Among Mother-Singleton Pairs in Project Viva

**eTable 9.** Associations Between Early Pregnancy Plasma Concentrations of Per- and Polyfluoroalkyl Substances and Birth Outcomes Across Quartile Groups by Early Pregnancy Dietary Folate Intake in the Subpopulation

**eTable 10.** Associations Between Early Pregnancy Plasma Concentrations of Per- and Polyfluoroalkyl Substances and Birth Outcomes Across Quartile Groups by Early Pregnancy Dietary Folate Intake, Further Adjusting for Average Fish Consumption in Early Pregnancy

**eTable 11.** Associations Between Early Pregnancy Plasma Concentrations of Per- and Polyfluoroalkyl Substances and Birth Outcomes Across Quartile Groups by Early Pregnancy Plasma Folate Concentrations, Further Adjusting for Average Fish Consumption in Early Pregnancy

**eTable 12.** Differences (95% CI) in Birthweight (Grams) per Doubling of Early Pregnancy Plasma Concentrations of Per- and Polyfluoroalkyl Substances Across Quartile Groups by Early Pregnancy Dietary Folate Intake or Plasma Folate Concentrations Among Mother-Singleton Pairs in Project Viva, Using Single-Value Imputation to Account for Missingness

**eTable 13.** Differences (95% CI) in Birthweight z Score per Doubling of Early Pregnancy Plasma Concentrations of Per- and Polyfluoroalkyl Substances Across Quartile Groups by Early Pregnancy Dietary Folate Intake or Plasma Folate Concentrations Among Mother-Singleton Pairs in Project Viva, Using Single-Value Imputation to Account for Missingness

**eTable 14.** Differences (95% CI) in Gestational Age (Days) per Doubling of Early Pregnancy Plasma Concentrations of Per- and Polyfluoroalkyl Substances Across Quartile Groups by Early Pregnancy Dietary Folate Intake or Plasma Folate Concentrations Among Mother-Singleton Pairs in Project Viva, Using Single-Value Imputation to Account for Missingness

**eTable 15.** Odds Ratios (95% CI) for Low Birthweight per Doubling of Early Pregnancy Plasma Concentrations of Per- and Polyfluoroalkyl Substances Across Quartile Groups by Early Pregnancy Dietary Folate Intake or Plasma Folate Concentrations Among Mother-Singleton Pairs in Project Viva, Using Single-Value Imputation to Account for Missingness

**eTable 16.** Odds Ratios (95% CI) for Preterm Birth per Doubling of Early Pregnancy Plasma Concentrations of Per- and Polyfluoroalkyl Substances Across Quartile Groups by Early Pregnancy Dietary Folate Intake or Plasma Folate Concentrations Among Mother-Singleton Pairs in Project Viva, Using Single-Value Imputation to Account for Missingness

**eFigure 1.** Participants' Inclusion Diagram of Mother-Singleton Pairs in Project Viva

**eFigure 2.** Directed Acyclic Graph Under the Null Hypothesis of PFAS-Birth Outcome Associations

**eFigure 3.** Spearman Correlation Coefficient Matrix for Early Pregnancy Dietary Folate Intake and Plasma Concentrations of Per- and Polyfluoroalkyl Substances and Folate Among Mother-Singleton Pairs in Project Viva

**eFigure 4.** Changes in the Beta Coefficients for the Relationships Between Log-2 Transformed Plasma Concentrations of Per- and Polyfluoroalkyl Substances With Birthweight Across Early Pregnancy Dietary Folate Equivalent Intake

**eFigure 5.** Changes in the Beta Coefficients for the Relationships Between Log-2 Transformed Plasma Concentrations of Per- and Polyfluoroalkyl Substances With Birthweight Across Early Pregnancy Plasma Folate Concentrations

**eFigure 6.** Changes in the Beta Coefficients for the Relationships Between Log-2 Transformed Plasma Concentrations of Per- and Polyfluoroalkyl Substances With Birthweight z Score Across Early Pregnancy Dietary Folate Equivalent Intake

**eFigure 7.** Changes in the Beta Coefficients for the Relationships Between Log-2 Transformed Plasma Concentrations of Per- and Polyfluoroalkyl Substances With Birthweight z Score Across Early Pregnancy Plasma Folate Concentrations

**eFigure 8.** Changes in Log (Odds Ratio) for Low Birthweight in Relation to Log-2 Transformed Plasma Concentrations of Per- and Polyfluoroalkyl Substances Across Early Pregnancy Plasma Folate Concentrations

**eFigure 9.** Changes in the Beta Coefficients for the Relationships Between Log-2 Transformed Plasma Concentrations of Per- and Polyfluoroalkyl Substances With Gestational Age Across Early Pregnancy Plasma Folate Concentrations

**eMethods.** Details on Analyses and Models

**eResults.** Details on Comparisons and Models

This supplementary material has been provided by the authors to give readers additional information about their work.

**eTable 1. Characteristics across the original Project Viva cohort (N=2128), the study population (N=1400), and the subpopulation (N=898).**

|                                                  | Original Population of<br>Project Viva<br>N=2128 | Study Population<br>N=1400 | Subpopulation<br>N=898 |
|--------------------------------------------------|--------------------------------------------------|----------------------------|------------------------|
| Maternal age, years, mean (SD)                   | 31.81 (5.22)                                     | 32.21 (4.89)               | 32.68 (4.62)           |
| Pre-pregnancy BMI, kg/m <sup>2</sup> , mean (SD) | 24.89 (5.52)                                     | 24.78 (5.39)               | 24.76 (5.25)           |
| AHEI-P score, mean (SD)                          | 60.57 (10.24)                                    | 60.46 (10.25)              | 61.10 (10.28)          |
| Maternal race and ethnicity                      |                                                  |                            |                        |
| White                                            | 1399 (65.7)                                      | 1025 (73.2)                | 678 (75.5)             |
| Black                                            | 348 (16.4)                                       | 167 (11.9)                 | 86 (9.6)               |
| Hispanic                                         | 154 (7.2)                                        | 87 (6.2)                   | 57 (6.3)               |
| Asian                                            | 120 (5.6)                                        | 68 (4.9)                   | 39 (4.3)               |
| Other                                            | 83 (3.9)                                         | 53 (3.8)                   | 38 (4.2)               |
| NA                                               | 24 (1.1)                                         | 0                          | 0                      |
| Maternal education ≥ college degree              | 1360 (63.9)                                      | 968 (69.1)                 | 663 (73.8)             |
| NA                                               | 24 (1.1)                                         | 0                          | 0                      |
| Paternal education ≥ college degree              | 1229 (57.8)                                      | 888 (63.4)                 | 596 (66.4)             |
| NA                                               | 224 (10.5)                                       | 97 (6.9)                   | 0                      |
| Annual household income > \$70,000               | 1146 (53.9)                                      | 820 (58.6)                 | 580 (64.6)             |
| NA                                               | 254 (11.9)                                       | 96 (6.9)                   | 0                      |
| Prenatal smoking                                 |                                                  |                            |                        |
| Never smoker                                     | 1443 (67.8)                                      | 932 (66.6)                 | 611 (68.0)             |
| Former smoker                                    | 398 (18.7)                                       | 296 (21.1)                 | 194 (21.6)             |
| Early pregnancy smoker                           | 266 (12.5)                                       | 168 (12.0)                 | 93 (10.4)              |
| NA                                               | 21 (1.0)                                         | 4 (0.3)                    | 0                      |
| Nulliparous                                      | 1017 (47.8)                                      | 696 (49.7)                 | 431 (48.0)             |
| Planned pregnancy                                | 1211 (56.9)                                      | 879 (62.8)                 | 580 (64.6)             |
| NA                                               | 114 (5.4)                                        | 27 (1.9)                   | 14 (1.6)               |
| Infertility                                      | 442 (20.8)                                       | 306 (21.9)                 | 210 (23.4)             |
| Periconception folic acid supplement user        | 1337 (62.8)                                      | 957 (68.4)                 | 629 (70.0)             |
| NA                                               | 50 (2.3)                                         | 1 (0.1)                    | 1 (0.1)                |
| Ever breastfeeding                               | 766 (36.0)                                       | 516 (36.9)                 | 381 (42.4)             |
| NA                                               | 185 (8.7)                                        | 78 (5.6)                   | 17 (1.9)               |
| Female infant                                    | 1032 (48.5)                                      | 685 (48.9)                 | 437 (48.7)             |
| Gestational age, weeks, mean (SD)                | 39.42 (1.97)                                     | 39.49 (1.86)               | 39.55 (1.79)           |
| Birthweight, grams, mean (SD)                    | 3460.91 (592.39)                                 | 3486.7 (572.8)             | 3519.47 (559.17)       |
| Birthweight z score, mean (SD)                   | 0.17 (0.97)                                      | 0.21 (0.95)                | 0.26 (0.95)            |
| Preterm birth                                    | 154 (7.2)                                        | 99 (7.1)                   | 56 (6.2)               |
| Low birthweight                                  | 111 (5.2)                                        | 64 (4.6)                   | 34 (3.8)               |

**Abbrev.** SD, standard deviation; AHEI-P, alternative healthy eating index in pregnancy; BMI, body mass index; NA, missing value.

**eTable 2. Distributions of early pregnancy plasma concentrations of per- and polyfluoroalkyl substances in the study population and by quartiles of early pregnancy dietary folate intake among mother-singleton pairs in Project Viva.**

| Chemical | Total Population<br>N=1400 |                        | 1st Quartile<br>N=350  | 2nd Quartile<br>N=350  | 3rd Quartile<br>N=350 | 4th Quartile<br>N=350  |
|----------|----------------------------|------------------------|------------------------|------------------------|-----------------------|------------------------|
|          | Detection Rate<br>(%)      | Median (IQR),<br>ng/mL | Median (IQR),<br>ng/mL | Median (IQR),<br>ng/mL | Median (IQR), ng/mL   | Median (IQR),<br>ng/mL |
| PFOA     | 100                        | 5.8 (4.1, 7.9)         | 5.6 (3.92, 7.9)        | 5.9 (4.4, 7.7)         | 6 (4.6, 8)            | 5.5 (3.82, 8)          |
| PFOS     | 99.9                       | 25.2 (18.6, 34.4)      | 25.8 (19.3, 35)        | 26.4 (19.1, 35.6)      | 25.9 (18.4, 34.4)     | 23.8 (17.6, 32.6)      |
| PFHxS    | 99.1                       | 2.4 (1.6, 3.7)         | 2.25 (1.6, 3.48)       | 2.4 (1.63, 3.58)       | 2.5 (1.8, 3.9)        | 2.6 (1.6, 3.88)        |
| PFNA     | 99.6                       | 0.7 (0.5, 0.9)         | 0.6 (0.5, 0.9)         | 0.7 (0.5, 0.9)         | 0.7 (0.5, 0.9)        | 0.7 (0.5, 0.9)         |
| MeFOSAA  | 100                        | 1.9 (1.2, 3)           | 2.1 (1.3, 3.1)         | 2.1 (1.4, 3.6)         | 1.65 (1.2, 2.77)      | 1.8 (1.1, 2.7)         |
| EtFOSAA  | 99.6                       | 1.2 (0.7, 1.9)         | 1.3 (0.8, 2)           | 1.3 (0.8, 2.1)         | 1.1 (0.7, 1.7)        | 1 (0.6, 1.8)           |

**Abbrev.** IQR, interquartile range; PFOA, perfluorooctanoic acid; PFOS, perfluorooctane sulfonic acid; PFHxS, perfluorohexane sulfonic acid; PFNA, perfluorononanoate; MeFOSAA, 2-(N-methyl-perfluorooctane sulfonamido) acetate; EtFOSAA, 2-(N-ethyl-perfluorooctane sulfonamido) acetate.

**eTable 3. Distributions of early pregnancy plasma concentrations of per- and polyfluoroalkyl substances in the subpopulation and by quartiles of early pregnancy plasma folate concentrations among mother-singleton pairs in Project Viva.**

| Chemical | Total Population<br>N=898 |                        | 1st Quartile<br>N=225  | 2nd Quartile<br>N=225  | 3rd Quartile<br>N=224  | 4th Quartile<br>N=224  |
|----------|---------------------------|------------------------|------------------------|------------------------|------------------------|------------------------|
|          | Detection Rate<br>(%)     | Median (IQR),<br>ng/mL | Median (IQR),<br>ng/mL | Median (IQR),<br>ng/mL | Median (IQR),<br>ng/mL | Median (IQR),<br>ng/mL |
| PFOA     | 100                       | 5.6 (4.03, 7.7)        | 5.7 (3.7, 8)           | 5.2 (3.9, 7.2)         | 5.6 (4.1, 7.6)         | 5.9 (4.4, 7.7)         |
| PFOS     | 100                       | 24.8 (18.3, 34.1)      | 25.3 (18.2, 35.4)      | 24 (18.1, 32.6)        | 25.5 (19.2, 34)        | 24.8 (18.2, 33)        |
| PFHxS    | 99.2                      | 2.4 (1.6, 3.7)         | 2.4 (1.5, 4.1)         | 2.2 (1.6, 3.7)         | 2.6 (1.8, 3.73)        | 2.6 (1.7, 3.6)         |
| PFNA     | 99.1                      | 0.6 (0.5, 0.9)         | 0.7 (0.5, 0.9)         | 0.6 (0.5, 0.9)         | 0.6 (0.5, 0.9)         | 0.7 (0.5, 0.9)         |
| MeFOSAA  | 100                       | 1.8 (1.2, 2.9)         | 1.9 (1.3, 2.8)         | 1.8 (1.2, 2.7)         | 1.8 (1.2, 3)           | 2 (1.3, 3.2)           |
| EtFOSAA  | 99.7                      | 1.1 (0.7, 1.9)         | 1.2 (0.7, 1.8)         | 1.1 (0.7, 1.8)         | 1.1 (0.775, 1.83)      | 1.1 (0.7, 1.92)        |

**Abbrev.** IQR, interquartile range; PFOA, perfluorooctanoic acid; PFOS, perfluorooctane sulfonic acid; PFHxS, perfluorohexane sulfonic acid; PFNA, perfluorononanoate; MeFOSAA, 2-(N-methyl-perfluorooctane sulfonamido) acetate; EtFOSAA, 2-(N-ethyl-perfluorooctane sulfonamido) acetate.

**eTable 4. Differences (95% CI) in birthweight (grams) per doubling of early pregnancy plasma concentrations of per- and polyfluoroalkyl substances across quartile groups by early pregnancy dietary folate intake or plasma folate concentrations among mother-singleton pairs in Project Viva.**

| Chemical                  | Early Pregnancy Dietary Folate Intake |                           |                           |                           |
|---------------------------|---------------------------------------|---------------------------|---------------------------|---------------------------|
|                           | 1st Quartile                          | 2nd Quartile              | 3rd Quartile              | 4th Quartile              |
|                           | Beta (95%CI) <sup>a</sup>             | Beta (95%CI) <sup>a</sup> | Beta (95%CI) <sup>a</sup> | Beta (95%CI) <sup>a</sup> |
| PFOA                      | <b>-89.13 (-166.84, -11.42)</b>       | -32.09 (-117.85, 53.68)   | -32.54 (-113.80, 48.72)   | -7.71 (-86.21, 70.78)     |
| PFOS                      | -37.20 (-106.81, 32.41)               | -57.74 (-138.09, 22.60)   | -74.21 (-154.08, 5.66)    | -56.59 (-140.86, 27.69)   |
| PFHxS                     | -0.88 (-53.94, 52.17)                 | -31.74 (-89.79, 26.31)    | 1.54 (-46.55, 49.64)      | 4.42 (-49.53, 58.38)      |
| PFNA                      | -27.35 (-96.92, 42.22)                | -56.19 (-131.81, 19.42)   | -44.26 (-119.34, 30.81)   | -54.92 (-132.83, 23.00)   |
| MeFOSAA                   | 11.74 (-49.14, 72.62)                 | -15.63 (-72.74, 41.48)    | -1.31 (-65.96, 63.33)     | -53.46 (-113.24, 6.33)    |
| EtFOSAA                   | 28.88 (-24.72, 82.47)                 | -16.29 (-66.81, 34.23)    | -24.53 (-76.62, 27.56)    | -23.43 (-78.96, 32.10)    |
| PFAS mixture <sup>b</sup> | 22.10 (-57.99, 102.19)                | -54.85 (-131.19, 21.49)   | -30.45 (-109.85, 48.95)   | -40.59 (-118.76, 37.58)   |

  

| Chemical                  | Early Pregnancy Plasma Folate Concentrations |                           |                           |                           |
|---------------------------|----------------------------------------------|---------------------------|---------------------------|---------------------------|
|                           | 1st Quartile                                 | 2nd Quartile              | 3rd Quartile              | 4th Quartile              |
|                           | Beta (95%CI) <sup>a</sup>                    | Beta (95%CI) <sup>a</sup> | Beta (95%CI) <sup>a</sup> | Beta (95%CI) <sup>a</sup> |
| PFOA                      | <b>-87.03 (-180.11, 6.05)</b>                | 4.23 (-97.02, 105.49)     | -62.90 (-169.92, 44.12)   | -23.42 (-126.52, 79.67)   |
| PFOS                      | <b>-100.23 (-199.06, -1.40)</b>              | -55.92 (-152.71, 40.87)   | -1.32 (-107.25, 104.61)   | -49.45 (-154.91, 56.02)   |
| PFHxS                     | 8.73 (-58.11, 75.56)                         | -44.03 (-104.66, 16.60)   | 24.73 (-38.46, 87.91)     | -28.28 (-96.89, 40.33)    |
| PFNA                      | <b>-91.34 (-186.84, 4.15)</b>                | -29.81 (-133.68, 74.05)   | 49.43 (-51.18, 150.04)    | -57.21 (-142.66, 28.25)   |
| MeFOSAA                   | -60.14 (-140.90, 20.62)                      | -7.87 (-85.85, 70.11)     | -32.32 (-109.17, 44.53)   | 6.10 (-65.27, 77.47)      |
| EtFOSAA                   | 16.03 (-45.66, 77.73)                        | -28.87 (-94.41, 36.68)    | -1.25 (-69.33, 66.82)     | -26.27 (-93.09, 40.54)    |
| PFAS mixture <sup>b</sup> | -27.37 (-122.58, 67.85)                      | -28.39 (-124.50, 67.71)   | -3.11 (-99.54, 93.32)     | -42.05 (-140.15, 56.04)   |

**Abbrev.** PFOA, perfluorooctanoic acid; PFOS, perfluorooctane sulfonic acid; PFHxS, perfluorohexane sulfonic acid; PFNA, perfluorononanoate; MeFOSAA, 2-(N-methyl-perfluorooctane sulfonamido) acetate; EtFOSAA, 2-(N-ethyl-perfluorooctane sulfonamido) acetate.

<sup>a</sup>: Models were adjusted for maternal age (continuous), education (≥ college graduate vs. not college graduate), race and ethnicity (White, Black, Hispanic, Asian, Other), BMI (continuous), smoking history (never, former, early pregnancy smoker), nulliparous (yes vs. no), breastfeeding history (yes vs. no), paternal education (≥ college graduate vs. not college graduate), annual household income (> vs. ≤ \$70,000), infertility (yes vs. no), planned pregnancy (yes vs. no), infant sex (male vs. female), gestational age at recruitment (continuous), and AHEI-P score in early pregnancy (continuous).

<sup>b</sup>: Mixture results were obtained from quantile-based g-computation models with single-value imputation (mean for continuous covariates, mode for categorical/binary covariates) for the missingness in covariates.

**eTable 5. Differences (95% CI) in birthweight z score per doubling of early pregnancy plasma concentrations of per- and polyfluoroalkyl substances across quartile groups by early pregnancy dietary folate intake or plasma folate concentrations among mother-singleton pairs in Project Viva.**

| Chemical                  | Early Pregnancy Dietary Folate Intake |                           |                           |                           |
|---------------------------|---------------------------------------|---------------------------|---------------------------|---------------------------|
|                           | 1st Quartile                          | 2nd Quartile              | 3rd Quartile              | 4th Quartile              |
|                           | Beta (95%CI) <sup>a</sup>             | Beta (95%CI) <sup>a</sup> | Beta (95%CI) <sup>a</sup> | Beta (95%CI) <sup>a</sup> |
| PFOA                      | <b>-0.13 (-0.26, -0.003)</b>          | -0.02 (-0.16, 0.13)       | -0.04 (-0.17, 0.10)       | -0.03 (-0.16, 0.10)       |
| PFOS                      | -0.04 (-0.15, 0.08)                   | -0.06 (-0.20, 0.07)       | -0.11 (-0.25, 0.02)       | -0.06 (-0.20, 0.08)       |
| PFHxS                     | 0.04 (-0.05, 0.12)                    | -0.03 (-0.13, 0.06)       | 0.01 (-0.07, 0.09)        | -0.02 (-0.11, 0.07)       |
| PFNA                      | -0.02 (-0.13, 0.10)                   | -0.09 (-0.22, 0.03)       | -0.11 (-0.24, 0.01)       | -0.10 (-0.23, 0.03)       |
| MeFOSAA                   | 0.01 (-0.09, 0.11)                    | -0.02 (-0.12, 0.08)       | -0.02 (-0.13, 0.09)       | -0.08 (-0.18, 0.02)       |
| EtFOSAA                   | 0.05 (-0.04, 0.14)                    | -0.04 (-0.12, 0.05)       | -0.02 (-0.11, 0.07)       | -0.02 (-0.11, 0.07)       |
| PFAS mixture <sup>b</sup> | 0.06 (-0.08, 0.19)                    | -0.07 (-0.20, 0.05)       | -0.05 (-0.18, 0.09)       | -0.06 (-0.19, 0.08)       |

  

| Chemical                  | Early Pregnancy Plasma Folate Concentrations |                           |                           |                           |
|---------------------------|----------------------------------------------|---------------------------|---------------------------|---------------------------|
|                           | 1st Quartile                                 | 2nd Quartile              | 3rd Quartile              | 4th Quartile              |
|                           | Beta (95%CI) <sup>a</sup>                    | Beta (95%CI) <sup>a</sup> | Beta (95%CI) <sup>a</sup> | Beta (95%CI) <sup>a</sup> |
| PFOA                      | <b>-0.14 (-0.30, 0.02)</b>                   | 0.02 (-0.15, 0.19)        | -0.05 (-0.23, 0.13)       | -0.07 (-0.24, 0.11)       |
| PFOS                      | -0.11 (-0.28, 0.05)                          | -0.09 (-0.25, 0.08)       | 0.03 (-0.15, 0.21)        | -0.10 (-0.28, 0.08)       |
| PFHxS                     | 0.03 (-0.08, 0.15)                           | -0.08 (-0.19, 0.02)       | 0.04 (-0.06, 0.15)        | -0.06 (-0.17, 0.06)       |
| PFNA                      | -0.08 (-0.25, 0.08)                          | -0.10 (-0.27, 0.08)       | 0.05 (-0.12, 0.22)        | -0.13 (-0.28, 0.01)       |
| MeFOSAA                   | -0.09 (-0.23, 0.04)                          | 0.02 (-0.11, 0.15)        | -0.01 (-0.14, 0.12)       | -0.02 (-0.14, 0.10)       |
| EtFOSAA                   | 0.04 (-0.07, 0.14)                           | -0.04 (-0.15, 0.08)       | 0.002 (-0.12, 0.11)       | -0.06 (-0.18, 0.05)       |
| PFAS mixture <sup>b</sup> | 0.01 (-0.16, 0.17)                           | -0.03 (-0.19, 0.13)       | -0.01 (-0.17, 0.16)       | -0.11 (-0.28, 0.06)       |

**Abbrev.** PFOA, perfluorooctanoic acid; PFOS, perfluorooctane sulfonic acid; PFHxS, perfluorohexane sulfonic acid; PFNA, perfluorononanoate; MeFOSAA, 2-(N-methyl-perfluorooctane sulfonamido) acetate; EtFOSAA, 2-(N-ethyl-perfluorooctane sulfonamido) acetate.

<sup>a</sup>: Models were adjusted for maternal age (continuous), education (≥ college graduate vs. not college graduate), race and ethnicity (White, Black, Hispanic, Asian, Other), BMI (continuous), smoking history (never, former, early pregnancy smoker), nulliparous (yes vs. no), breastfeeding history (yes vs. no), paternal education (≥ college graduate vs. not college graduate), annual household income (> vs. ≤ \$70,000), infertility (yes vs. no), planned pregnancy (yes vs. no), infant sex (male vs. female), gestational age at recruitment (continuous), and AHEI-P score in early pregnancy (continuous).

<sup>b</sup>: Mixture results were obtained from quantile-based g-computation models with single-value imputation (mean for continuous covariates, mode for categorical/binary covariates) for the missingness in covariates.

**eTable 6. Differences (95% CI) in gestational age (days) per doubling of early pregnancy plasma concentrations of per- and polyfluoroalkyl substances across quartile groups by early pregnancy dietary folate intake or plasma folate concentrations among mother-singleton pairs in Project Viva.**

| Chemical                  | Early Pregnancy Dietary Folate Intake     |                                           |                                           |                                           |
|---------------------------|-------------------------------------------|-------------------------------------------|-------------------------------------------|-------------------------------------------|
|                           | 1st Quartile<br>Beta (95%CI) <sup>a</sup> | 2nd Quartile<br>Beta (95%CI) <sup>a</sup> | 3rd Quartile<br>Beta (95%CI) <sup>a</sup> | 4th Quartile<br>Beta (95%CI) <sup>a</sup> |
| PFOA                      | -1.31 (-3.12, 0.51)                       | -0.91 (-2.91, 1.10)                       | -0.61 (-2.51, 1.29)                       | 0.41 (-1.42, 2.25)                        |
| PFOS                      | -1.46 (-3.09, 0.17)                       | -1.28 (-3.16, 0.60)                       | -0.94 (-2.81, 0.92)                       | -0.74 (-2.71, 1.23)                       |
| PFHxS                     | -0.96 (-2.20, 0.28)                       | -0.47 (-1.83, 0.88)                       | 0.13 (-0.99, 1.25)                        | 0.63 (-0.63, 1.89)                        |
| PFNA                      | -0.91 (-2.54, 0.72)                       | -0.11 (-1.88, 1.66)                       | 0.31 (-1.44, 2.07)                        | -0.02 (-1.85, 1.80)                       |
| MeFOSAA                   | -0.01 (-1.43, 1.41)                       | -0.04 (-1.37, 1.30)                       | 0.47 (-1.04, 1.98)                        | -0.78 (-2.18, 0.62)                       |
| EtFOSAA                   | 0.31 (-0.94, 1.57)                        | -0.03 (-1.21, 1.15)                       | -0.49 (-1.70, 0.73)                       | -0.67 (-1.97, 0.62)                       |
| PFAS mixture <sup>b</sup> | -0.24 (-2.12, 1.64)                       | -0.57 (-2.36, 1.22)                       | -0.13 (-1.99, 1.73)                       | -0.66 (-2.49, 1.17)                       |

  

| Chemical                  | Early Pregnancy Plasma Folate Concentrations |                                           |                                           |                                           |
|---------------------------|----------------------------------------------|-------------------------------------------|-------------------------------------------|-------------------------------------------|
|                           | 1st Quartile<br>Beta (95%CI) <sup>a</sup>    | 2nd Quartile<br>Beta (95%CI) <sup>a</sup> | 3rd Quartile<br>Beta (95%CI) <sup>a</sup> | 4th Quartile<br>Beta (95%CI) <sup>a</sup> |
| PFOA                      | -0.98 (-3.12, 1.17)                          | -0.09 (-2.42, 2.25)                       | -1.50 (-3.97, 0.97)                       | 0 (-2.38, 2.38)                           |
| PFOS                      | -2.02 (-4.30, 0.26)                          | -0.42 (-2.66, 1.81)                       | -0.93 (-3.37, 1.51)                       | -0.78 (-3.21, 1.65)                       |
| PFHxS                     | 0.08 (-1.46, 1.62)                           | 0.05 (-1.35, 1.44)                        | 0.48 (-0.98, 1.93)                        | -0.36 (-1.94, 1.22)                       |
| PFNA                      | <b>-2.28 (-4.48, -0.08)</b>                  | 0.69 (-1.70, 3.08)                        | 1.02 (-1.30, 3.34)                        | -0.03 (-2.00, 1.94)                       |
| MeFOSAA                   | -1.08 (-2.94, 0.78)                          | -0.76 (-2.55, 1.04)                       | -0.82 (-2.59, 0.95)                       | 0.39 (-1.26, 2.03)                        |
| EtFOSAA                   | -0.08 (-1.50, 1.34)                          | -0.64 (-2.15, 0.87)                       | -0.20 (-1.77, 1.37)                       | 0.32 (-1.22, 1.86)                        |
| PFAS mixture <sup>b</sup> | -1.07 (-3.27, 1.12)                          | -0.39 (-2.60, 1.83)                       | 0.12 (-2.11, 2.34)                        | 0.27 (-1.99, 2.53)                        |

**Abbrev.** PFOA, perfluorooctanoic acid; PFOS, perfluorooctane sulfonic acid; PFHxS, perfluorohexane sulfonic acid; PFNA, perfluorononanoate; MeFOSAA, 2-(N-methyl-perfluorooctane sulfonamido) acetate; EtFOSAA, 2-(N-ethyl-perfluorooctane sulfonamido) acetate.

<sup>a</sup>: Models were adjusted for maternal age (continuous), education ( $\geq$  college graduate vs. not college graduate), race and ethnicity (White, Black, Hispanic, Asian, Other), BMI (continuous), smoking history (never, former, early pregnancy smoker), nulliparous (yes vs. no), breastfeeding history (yes vs. no), paternal education ( $\geq$  college graduate vs. not college graduate), annual household income ( $>$  vs.  $\leq$  \$70,000), infertility (yes vs. no), planned pregnancy (yes vs. no), infant sex (male vs. female), gestational age at recruitment (continuous), and AHEI-P score in early pregnancy (continuous).

<sup>b</sup>: Mixture results were obtained from quantile-based g-computation models with single-value imputation (mean for continuous covariates, mode for categorical/binary covariates) for the missingness in covariates.

**eTable 7. Odds Ratios (95% CI) for low birthweight per doubling of early pregnancy plasma concentrations of per- and polyfluoroalkyl substances across quartile groups by early pregnancy dietary folate intake or plasma folate concentrations among mother-singleton pairs in Project Viva.**

| Chemical                  | Early Pregnancy Dietary Folate Intake |                         |
|---------------------------|---------------------------------------|-------------------------|
|                           | 1st Quartile                          | 2nd – 4th Quartile      |
|                           | OR (95%CI) <sup>a</sup>               | OR (95%CI) <sup>a</sup> |
| PFOA                      | 1.53 (0.77, 3.02)                     | 1.11 (0.69, 1.76)       |
| PFOS                      | 1.60 (0.83, 3.08)                     | 1.41 (0.91, 2.18)       |
| PFHxS                     | 1.21 (0.78, 1.88)                     | 1.00 (0.75, 1.32)       |
| PFNA                      | 1.20 (0.67, 2.12)                     | 1.41 (0.90, 2.21)       |
| MeFOSAA                   | 0.85 (0.52, 1.38)                     | 1.26 (0.90, 1.76)       |
| EtFOSAA                   | 1.05 (0.67, 1.62)                     | 1.03 (0.77, 1.37)       |
| PFAS mixture <sup>b</sup> | 1.07 (0.55, 2.06)                     | 1.18 (0.76, 1.84)       |

  

| Chemical                  | Early Pregnancy Plasma Folate Concentrations |                         |
|---------------------------|----------------------------------------------|-------------------------|
|                           | 1st Quartile                                 | 2nd – 4th Quartile      |
|                           | OR (95%CI) <sup>a</sup>                      | OR (95%CI) <sup>a</sup> |
| PFOA                      | 1.56 (0.70, 3.47)                            | 1.25 (0.61, 2.57)       |
| PFOS                      | <b>2.46 (1.05, 5.8)</b>                      | 1.15 (0.59, 2.21)       |
| PFHxS                     | 1.32 (0.79, 2.18)                            | 0.94 (0.61, 1.44)       |
| PFNA                      | 1.32 (0.64, 2.71)                            | 0.99 (0.54, 1.84)       |
| MeFOSAA                   | 0.86 (0.44, 1.69)                            | 1.43 (0.88, 2.34)       |
| EtFOSAA                   | 1.09 (0.66, 1.81)                            | 0.96 (0.60, 1.52)       |
| PFAS mixture <sup>b</sup> | 1.45 (0.63, 3.35)                            | 1.05 (0.53, 2.06)       |

**Abbrev.** PFOA, perfluorooctanoic acid; PFOS, perfluorooctane sulfonic acid; PFHxS, perfluorohexane sulfonic acid; PFNA, perfluorononanoate; MeFOSAA, 2-(N-methyl-perfluorooctane sulfonamido) acetate; EtFOSAA, 2-(N-ethyl-perfluorooctane sulfonamido) acetate.

<sup>a</sup>: Models were adjusted for maternal age (continuous), education (≥ college graduate vs. not college graduate), race and ethnicity (White, Black, Hispanic, Asian, Other), BMI (continuous), smoking history (never, former, early pregnancy smoker), nulliparous (yes vs. no), breastfeeding history (yes vs. no), paternal education (≥ college graduate vs. not college graduate), annual household income (> vs. ≤ \$70,000), infertility (yes vs. no), planned pregnancy (yes vs. no), infant sex (male vs. female), gestational age at recruitment (continuous), and AHEI-P score in early pregnancy (continuous).

<sup>b</sup>: Mixture results were obtained from quantile-based g-computation models with single-value imputation (mean for continuous covariates, mode for categorical/binary covariates) for the missingness in covariates.



**eTable 8. Odds Ratios (95% CI) for preterm birth per doubling of early pregnancy plasma concentrations of per- and polyfluoroalkyl substances across quartile groups by early pregnancy dietary folate intake or plasma folate concentrations among mother-singleton pairs in Project Viva.**

| Chemical                  | Early Pregnancy Dietary Folate Intake        |                                               |
|---------------------------|----------------------------------------------|-----------------------------------------------|
|                           | 1st Quartile<br>OR (95%CI) <sup>a</sup>      | 2nd – 4th Quartile<br>OR (95%CI) <sup>a</sup> |
| PFOA                      | 1.31 (0.77, 2.24)                            | 1.01 (0.69, 1.48)                             |
| PFOS                      | 1.55 (0.92, 2.62)                            | 1.14 (0.80, 1.64)                             |
| PFHxS                     | 1.20 (0.84, 1.69)                            | 1.08 (0.85, 1.37)                             |
| PFNA                      | 1.38 (0.85, 2.25)                            | 1.06 (0.75, 1.51)                             |
| MeFOSAA                   | 0.91 (0.61, 1.36)                            | 1.11 (0.84, 1.46)                             |
| EtFOSAA                   | 1.15 (0.81, 1.64)                            | 1.00 (0.79, 1.27)                             |
| PFAS mixture <sup>b</sup> | 1.30 (0.77, 2.22)                            | 1.20 (0.84, 1.72)                             |
| Chemical                  | Early Pregnancy Plasma Folate Concentrations |                                               |
|                           | 1st Quartile<br>OR (95%CI) <sup>a</sup>      | 2nd – 4th Quartile<br>OR (95%CI) <sup>a</sup> |
| PFOA                      | 1.11 (0.60, 2.04)                            | 1.15 (0.66, 2.03)                             |
| PFOS                      | 1.51 (0.80, 2.85)                            | 1.16 (0.69, 1.95)                             |
| PFHxS                     | 1.03 (0.67, 1.56)                            | 0.95 (0.69, 1.30)                             |
| PFNA                      | 1.39 (0.75, 2.57)                            | 0.87 (0.54, 1.41)                             |
| MeFOSAA                   | 1.44 (0.83, 2.49)                            | 1.19 (0.80, 1.76)                             |
| EtFOSAA                   | 1.14 (0.77, 1.69)                            | 0.99 (0.69, 1.41)                             |
| PFAS mixture <sup>b</sup> | 1.69 (0.88, 3.25)                            | 0.99 (0.59, 1.66)                             |

**Abbrev.** PFOA, perfluorooctanoic acid; PFOS, perfluorooctane sulfonic acid; PFHxS, perfluorohexane sulfonic acid; PFNA, perfluorononanoate; MeFOSAA, 2-(N-methyl-perfluorooctane sulfonamido) acetate; EtFOSAA, 2-(N-ethyl-perfluorooctane sulfonamido) acetate.

<sup>a</sup>: Models were adjusted for maternal age (continuous), education ( $\geq$  college graduate vs. not college graduate), race and ethnicity (White, Black, Hispanic, Asian, Other), BMI (continuous), smoking history (never, former, early pregnancy smoker), nulliparous (yes vs. no), breastfeeding history (yes vs. no), paternal education ( $\geq$  college graduate vs. not college graduate), annual household income ( $>$  vs.  $\leq$  \$70,000), infertility (yes vs. no), planned pregnancy (yes vs. no), infant sex (male vs. female), gestational age at recruitment (continuous), and AHEI-P score in early pregnancy (continuous).

<sup>b</sup>: Mixture results were obtained from quantile-based g-computation models with single-value imputation (mean for continuous covariates, mode for categorical/binary covariates) for the missingness in covariates.

**eTable 9. Associations between early pregnancy plasma concentrations of per- and polyfluoroalkyl substances and birth outcomes across quartile groups by early pregnancy dietary folate intake in the subpopulation.**

|                                      |         | Early Pregnancy Dietary Folate Intake |                           |                           |                            |
|--------------------------------------|---------|---------------------------------------|---------------------------|---------------------------|----------------------------|
|                                      |         | 1st Quartile                          | 2nd Quartile              | 3rd Quartile              | 4th Quartile               |
| Dietary folate intake range, mcg/day |         | 128.67 - 676.10<br>N=208              | 676.10 - 941.94<br>N=208  | 941.94 - 1194.34<br>N=207 | 1194.34 - 2874.29<br>N=208 |
|                                      |         | Beta (95%CI) <sup>a</sup>             | Beta (95%CI) <sup>a</sup> | Beta (95%CI) <sup>a</sup> | Beta (95%CI) <sup>a</sup>  |
| Birthweight (grams)                  |         |                                       |                           |                           |                            |
|                                      | PFOA    | <b>-120.64 (-218.80, -22.48)</b>      | -55.23 (-163.93, 53.46)   | 6.76 (-95.79, 109.31)     | 4.03 (-92.13, 100.19)      |
|                                      | PFOS    | -65.35 (-171.34, 40.65)               | -94.25 (-193.24, 4.74)    | -25.03 (-128.19, 78.14)   | -39.04 (-139.47, 61.39)    |
|                                      | PFHxS   | 5.71 (-61.40, 72.82)                  | -50.38 (-123.79, 23.03)   | -3.44 (-60.04, 53.16)     | -6.48 (-71.66, 58.70)      |
|                                      | PFNA    | -31.24 (-129.54, 67.05)               | -67.84 (-159.81, 24.12)   | 14.70 (-83.41, 112.80)    | -60.67 (-158.52, 37.17)    |
|                                      | MeFOSAA | 0.77 (-74.42, 75.96)                  | 5.07 (-69.37, 79.50)      | -17.72 (-101.03, 65.60)   | -65.15 (-143.01, 12.72)    |
|                                      | EtFOSAA | 24.58 (-43.11, 92.27)                 | -19.71 (-82.60, 43.18)    | -6.63 (-72.02, 58.75)     | -34.66 (-103.56, 34.24)    |
| Birthweight Z-score                  |         |                                       |                           |                           |                            |
|                                      | PFOA    | <b>-0.17 (-0.34, -0.003)</b>          | -0.11 (-0.30, 0.07)       | 0.04 (-0.14, 0.21)        | 0.01 (-0.15, 0.17)         |
|                                      | PFOS    | -0.13 (-0.31, 0.05)                   | -0.15 (-0.32, 0.02)       | 0 (-0.18, 0.17)           | 0 (-0.17, 0.17)            |
|                                      | PFHxS   | 0.01 (-0.10, 0.12)                    | -0.06 (-0.18, 0.07)       | 0 (-0.10, 0.10)           | -0.04 (-0.15, 0.07)        |
|                                      | PFNA    | -0.08 (-0.24, 0.09)                   | -0.10 (-0.26, 0.05)       | -0.01 (-0.18, 0.16)       | -0.10 (-0.26, 0.07)        |
|                                      | MeFOSAA | 0.04 (-0.09, 0.16)                    | -0.01 (-0.14, 0.11)       | -0.03 (-0.17, 0.11)       | -0.06 (-0.2, 0.07)         |
|                                      | EtFOSAA | 0.03 (-0.08, 0.14)                    | -0.07 (-0.18, 0.03)       | 0.02 (-0.09, 0.13)        | -0.02 (-0.14, 0.09)        |
| Gestational Age (days)               |         |                                       |                           |                           |                            |
|                                      | PFOA    | -2.06 (-4.31, 0.20)                   | -0.28 (-2.78, 2.21)       | -0.51 (-2.86, 1.85)       | 0.33 (-1.88, 2.54)         |
|                                      | PFOS    | -0.76 (-3.19, 1.68)                   | -1.27 (-3.54, 1)          | -1.21 (-3.58, 1.15)       | -1.37 (-3.67, 0.94)        |
|                                      | PFHxS   | -0.27 (-1.81, 1.27)                   | -0.79 (-2.48, 0.89)       | 0.36 (-0.94, 1.66)        | 0.65 (-0.84, 2.15)         |
|                                      | PFNA    | -0.28 (-2.54, 1.97)                   | -0.67 (-2.78, 1.45)       | 0.52 (-1.73, 2.78)        | -0.56 (-2.80, 1.69)        |
|                                      | MeFOSAA | -1.11 (-2.83, 0.61)                   | 0.72 (-0.98, 2.43)        | -0.10 (-2.01, 1.80)       | -1.54 (-3.33, 0.24)        |
|                                      | EtFOSAA | 0.47 (-1.08, 2.02)                    | 0.51 (-0.93, 1.95)        | -0.62 (-2.12, 0.88)       | -1.18 (-2.75, 0.40)        |
|                                      |         | 1st Quartile                          | 2nd - 4th Quartile        |                           |                            |
|                                      |         | OR (95%CI) <sup>a</sup>               | OR (95%CI) <sup>a</sup>   |                           |                            |
| Preterm Birth                        |         |                                       |                           |                           |                            |
|                                      | PFOA    | 1.85 (0.80, 4.29)                     | 0.97 (0.59, 1.61)         |                           |                            |
|                                      | PFOS    | 1.74 (0.78, 3.87)                     | 1.22 (0.76, 1.95)         |                           |                            |
|                                      | PFHxS   | 0.85 (0.50, 1.43)                     | 1.06 (0.79, 1.43)         |                           |                            |
|                                      | PFNA    | 1.09 (0.55, 2.18)                     | 1.04 (0.66, 1.63)         |                           |                            |
|                                      | MeFOSAA | 1.19 (0.66, 2.12)                     | 1.29 (0.89, 1.87)         |                           |                            |
|                                      | EtFOSAA | 1.19 (0.70, 2.01)                     | 1.01 (0.74, 1.38)         |                           |                            |
| Low Birthweight                      |         |                                       |                           |                           |                            |
|                                      | PFOA    | 1.62 (0.63, 4.15)                     | 1.28 (0.65, 2.52)         |                           |                            |

|         |                   |                   |
|---------|-------------------|-------------------|
| PFOS    | 1.49 (0.58, 3.85) | 1.60 (0.86, 2.99) |
| PFHxS   | 0.89 (0.47, 1.69) | 1.20 (0.80, 1.78) |
| PFNA    | 0.80 (0.38, 1.71) | 1.38 (0.74, 2.56) |
| MeFOSAA | 0.82 (0.43, 1.55) | 1.47 (0.90, 2.40) |
| EtFOSAA | 1.17 (0.65, 2.13) | 0.94 (0.61, 1.44) |

---

**Abbrev.** PFOA, perfluorooctanoic acid; PFOS, perfluorooctane sulfonic acid; PFHxS, perfluorohexane sulfonic acid; PFNA, perfluorononanoate; MeFOSAA, 2-(N-methyl-perfluorooctane sulfonamido) acetate; EtFOSAA, 2-(N-ethyl-perfluorooctane sulfonamido) acetate.

<sup>a</sup>: Models were adjusted for maternal age (continuous), education ( $\geq$  college graduate vs. not college graduate), race and ethnicity (White, Black, Hispanic, Asian, Other), BMI (continuous), smoking history (never, former, early pregnancy smoker), nulliparous (yes vs. no), breastfeeding history (yes vs. no), paternal education ( $\geq$  college graduate vs. not college graduate), annual household income ( $>$  vs.  $\leq$  \$70,000), infertility (yes vs. no), planned pregnancy (yes vs. no), infant sex (male vs. female), gestational age at recruitment (continuous), and AHEI-P score in early pregnancy (continuous).

**eTable 10. Associations between early pregnancy plasma concentrations of per- and polyfluoroalkyl substances and birth outcomes across quartile groups by early pregnancy dietary folate intake, further adjusting for average fish consumption in early pregnancy.**

|                        |                     | Early Pregnancy Dietary Folate Intake |                           |                           |                           |
|------------------------|---------------------|---------------------------------------|---------------------------|---------------------------|---------------------------|
|                        |                     | 1st Quartile                          | 2nd Quartile              | 3rd Quartile              | 4th Quartile              |
|                        |                     | Beta (95%CI) <sup>a</sup>             | Beta (95%CI) <sup>a</sup> | Beta (95%CI) <sup>a</sup> | Beta (95%CI) <sup>a</sup> |
| Birthweight (grams)    | PFOA                | <b>-84.72 (-162.66, -6.79)</b>        | -29.82 (-115.7, 56.06)    | -28.77 (-110.21, 52.66)   | -6.72 (-85.29, 71.85)     |
|                        | PFOS                | -33.78 (-103.54, 35.98)               | -51.22 (-131.98, 29.53)   | -71.66 (-151.64, 8.33)    | -55.97 (-140.24, 28.31)   |
|                        | PFHxS               | -0.62 (-53.65, 52.42)                 | -30.82 (-88.83, 27.19)    | 3.57 (-44.60, 51.73)      | 5.30 (-48.64, 59.23)      |
|                        | PFNA                | -23.04 (-93.14, 47.06)                | -50.15 (-126.39, 26.09)   | -41.34 (-116.63, 33.96)   | -52.20 (-130.28, 25.88)   |
|                        | MeFOSAA             | 11.41 (-49.47, 72.3)                  | -13.55 (-70.67, 43.57)    | -1.31 (-65.90, 63.28)     | -55.20 (-114.98, 4.58)    |
|                        | EtFOSAA             | 29.37 (-24.18, 82.92)                 | -14.35 (-64.89, 36.18)    | -24.10 (-76.13, 27.93)    | -22.27 (-77.81, 33.28)    |
|                        | Birthweight Z-score | PFOA                                  | -0.12 (-0.25, 0.01)       | -0.01 (-0.16, 0.13)       | -0.03 (-0.17, 0.11)       |
| PFOS                   |                     | -0.03 (-0.15, 0.09)                   | -0.05 (-0.19, 0.08)       | -0.11 (-0.24, 0.03)       | -0.06 (-0.20, 0.08)       |
| PFHxS                  |                     | 0.04 (-0.05, 0.12)                    | -0.03 (-0.13, 0.06)       | 0.02 (-0.06, 0.10)        | -0.01 (-0.10, 0.08)       |
| PFNA                   |                     | -0.01 (-0.12, 0.11)                   | -0.08 (-0.21, 0.04)       | -0.11 (-0.23, 0.02)       | -0.09 (-0.22, 0.04)       |
| MeFOSAA                |                     | 0.01 (-0.09, 0.11)                    | -0.02 (-0.11, 0.08)       | -0.02 (-0.13, 0.09)       | -0.08 (-0.18, 0.02)       |
| EtFOSAA                |                     | 0.05 (-0.04, 0.14)                    | -0.03 (-0.12, 0.05)       | -0.02 (-0.11, 0.07)       | -0.02 (-0.11, 0.08)       |
| Gestational Age (days) |                     | PFOA                                  | -1.30 (-3.12, 0.52)       | -0.89 (-2.90, 1.11)       | -0.59 (-2.49, 1.31)       |
|                        | PFOS                | -1.46 (-3.09, 0.17)                   | -1.25 (-3.14, 0.64)       | -0.94 (-2.81, 0.93)       | -0.75 (-2.72, 1.22)       |
|                        | PFHxS               | -0.97 (-2.21, 0.27)                   | -0.46 (-1.82, 0.89)       | 0.14 (-0.99, 1.26)        | 0.63 (-0.63, 1.89)        |
|                        | PFNA                | -0.92 (-2.56, 0.72)                   | -0.07 (-1.85, 1.71)       | 0.31 (-1.45, 2.07)        | -0.03 (-1.85, 1.8)        |
|                        | MeFOSAA             | 0 (-1.43, 1.42)                       | -0.02 (-1.36, 1.31)       | 0.47 (-1.04, 1.98)        | -0.80 (-2.20, 0.60)       |
|                        | EtFOSAA             | 0.32 (-0.93, 1.57)                    | -0.02 (-1.20, 1.17)       | -0.48 (-1.69, 0.74)       | -0.67 (-1.97, 0.63)       |
|                        |                     |                                       | 1st Quartile              | 2nd - 4th Quartile        |                           |
|                        |                     | OR (95%CI) <sup>a</sup>               | OR (95%CI) <sup>a</sup>   |                           |                           |
| Preterm Birth          | PFOA                | 1.31 (0.77, 2.23)                     | 1 (0.68, 1.47)            |                           |                           |
|                        | PFOS                | 1.56 (0.93, 2.61)                     | 1.15 (0.80, 1.65)         |                           |                           |
|                        | PFHxS               | 1.20 (0.84, 1.70)                     | 1.08 (0.86, 1.37)         |                           |                           |
|                        | PFNA                | 1.43 (0.88, 2.33)                     | 1.09 (0.76, 1.55)         |                           |                           |
|                        | MeFOSAA             | 0.90 (0.60, 1.33)                     | 1.11 (0.84, 1.46)         |                           |                           |
|                        | EtFOSAA             | 1.14 (0.80, 1.62)                     | 1 (0.79, 1.27)            |                           |                           |
|                        | Low Birthweight     | PFOA                                  | 1.55 (0.78, 3.05)         | 1.11 (0.70, 1.77)         |                           |
| PFOS                   |                     | 1.62 (0.84, 3.10)                     | 1.42 (0.91, 2.21)         |                           |                           |
| PFHxS                  |                     | 1.22 (0.79, 1.89)                     | 1 (0.75, 1.33)            |                           |                           |
| PFNA                   |                     | 1.24 (0.69, 2.21)                     | 1.44 (0.91, 2.26)         |                           |                           |

|         |                   |                   |
|---------|-------------------|-------------------|
| MeFOSAA | 0.85 (0.53, 1.38) | 1.26 (0.90, 1.77) |
| EtFOSAA | 1.04 (0.67, 1.61) | 1.03 (0.77, 1.37) |

---

**Abbrev.** PFOA, perfluorooctanoic acid; PFOS, perfluorooctane sulfonic acid; PFHxS, perfluorohexane sulfonic acid; PFNA, perfluorononanoate; MeFOSAA, 2-(N-methyl-perfluorooctane sulfonamido) acetate; EtFOSAA, 2-(N-ethyl-perfluorooctane sulfonamido) acetate.

<sup>a</sup>: Models were adjusted for maternal age (continuous), education ( $\geq$  college graduate vs. not college graduate), race and ethnicity (White, Black, Hispanic, Asian, Other), BMI (continuous), smoking history (never, former, early pregnancy smoker), nulliparous (yes vs. no), breastfeeding history (yes vs. no), paternal education ( $\geq$  college graduate vs. not college graduate), annual household income ( $>$  vs.  $\leq$  \$70,000), infertility (yes vs. no), planned pregnancy (yes vs. no), infant sex (male vs. female), gestational age at recruitment (continuous), AHEI-P score in early pregnancy (continuous), and average fish consumption in early pregnancy (continuous).

**eTable 11. Associations between early pregnancy plasma concentrations of per- and polyfluoroalkyl substances and birth outcomes across quartile groups by early pregnancy plasma folate concentrations, further adjusting for average fish consumption in early pregnancy.**

|                        |         | Early Pregnancy Plasma Folate Concentrations |                           |                           |                           |
|------------------------|---------|----------------------------------------------|---------------------------|---------------------------|---------------------------|
|                        |         | 1st Quartile                                 | 2nd Quartile              | 3rd Quartile              | 4th Quartile              |
|                        |         | Beta (95%CI) <sup>a</sup>                    | Beta (95%CI) <sup>a</sup> | Beta (95%CI) <sup>a</sup> | Beta (95%CI) <sup>a</sup> |
| Birthweight (grams)    |         |                                              |                           |                           |                           |
|                        | PFOA    | <b>-85.25 (-178.43, 7.92)</b>                | 6.76 (-94.61, 108.14)     | -62.14 (-169.21, 44.94)   | -21.70 (-124.96, 81.57)   |
|                        | PFOS    | <b>-98.83 (-197.86, 0.19)</b>                | -53.42 (-150.54, 43.71)   | -1.15 (-107.18, 104.89)   | -48.16 (-153.96, 57.63)   |
|                        | PFHxS   | 8.81 (-58.05, 75.66)                         | -43.26 (-103.92, 17.40)   | 24.81 (-38.40, 88.01)     | -27.32 (-96.11, 41.48)    |
|                        | PFNA    | <b>-91.00 (-186.70, 4.70)</b>                | -26.26 (-130.90, 78.38)   | 50.80 (-50.06, 151.65)    | -56.15 (-141.86, 29.56)   |
|                        | MeFOSAA | -59.29 (-140.09, 21.5)                       | -8.40 (-86.48, 69.68)     | -33.58 (-110.51, 43.36)   | 7.22 (-64.25, 78.68)      |
|                        | EtFOSAA | 17.36 (-44.41, 79.13)                        | -27.76 (-93.36, 37.84)    | -1.66 (-69.74, 66.41)     | -24.65 (-91.66, 42.35)    |
| Birthweight Z-score    |         |                                              |                           |                           |                           |
|                        | PFOA    | -0.14 (-0.30, 0.02)                          | 0.03 (-0.14, 0.20)        | -0.05 (-0.23, 0.13)       | -0.06 (-0.24, 0.11)       |
|                        | PFOS    | -0.11 (-0.28, 0.06)                          | -0.08 (-0.25, 0.08)       | 0.03 (-0.15, 0.21)        | -0.09 (-0.27, 0.09)       |
|                        | PFHxS   | 0.03 (-0.08, 0.15)                           | -0.08 (-0.19, 0.02)       | 0.04 (-0.06, 0.15)        | -0.05 (-0.17, 0.06)       |
|                        | PFNA    | -0.08 (-0.24, 0.08)                          | -0.08 (-0.26, 0.09)       | 0.06 (-0.11, 0.23)        | -0.13 (-0.27, 0.02)       |
|                        | MeFOSAA | -0.09 (-0.23, 0.05)                          | 0.02 (-0.12, 0.15)        | -0.01 (-0.14, 0.12)       | -0.01 (-0.13, 0.11)       |
|                        | EtFOSAA | 0.04 (-0.06, 0.15)                           | -0.03 (-0.14, 0.08)       | 0 (-0.12, 0.11)           | -0.06 (-0.17, 0.05)       |
| Gestational Age (days) |         |                                              |                           |                           |                           |
|                        | PFOA    | -0.99 (-3.14, 1.16)                          | -0.11 (-2.45, 2.23)       | -1.51 (-3.98, 0.96)       | -0.02 (-2.41, 2.36)       |
|                        | PFOS    | -2.06 (-4.34, 0.22)                          | -0.47 (-2.71, 1.77)       | -0.95 (-3.40, 1.49)       | -0.84 (-3.28, 1.60)       |
|                        | PFHxS   | 0.08 (-1.47, 1.62)                           | 0.05 (-1.35, 1.45)        | 0.47 (-0.98, 1.93)        | -0.39 (-1.98, 1.20)       |
|                        | PFNA    | <b>-2.33 (-4.54, -0.13)</b>                  | 0.62 (-1.79, 3.03)        | 0.99 (-1.33, 3.32)        | -0.07 (-2.05, 1.90)       |
|                        | MeFOSAA | -1.09 (-2.95, 0.77)                          | -0.73 (-2.53, 1.07)       | -0.82 (-2.59, 0.96)       | 0.37 (-1.28, 2.01)        |
|                        | EtFOSAA | -0.08 (-1.50, 1.35)                          | -0.64 (-2.16, 0.87)       | -0.19 (-1.76, 1.37)       | 0.29 (-1.25, 1.84)        |
|                        |         | 1st Quartile                                 | 2nd - 4th Quartile        |                           |                           |
|                        |         | OR (95%CI) <sup>a</sup>                      | OR (95%CI) <sup>a</sup>   |                           |                           |
| Preterm Birth          |         |                                              |                           |                           |                           |
|                        | PFOA    | 1.11 (0.60, 2.06)                            | 1.18 (0.66, 2.08)         |                           |                           |
|                        | PFOS    | 1.53 (0.81, 2.90)                            | 1.21 (0.71, 2.07)         |                           |                           |
|                        | PFHxS   | 1.02 (0.67, 1.56)                            | 0.96 (0.69, 1.32)         |                           |                           |
|                        | PFNA    | 1.43 (0.77, 2.64)                            | 0.90 (0.55, 1.47)         |                           |                           |
|                        | MeFOSAA | 1.44 (0.83, 2.50)                            | 1.19 (0.80, 1.77)         |                           |                           |
|                        | EtFOSAA | 1.13 (0.76, 1.68)                            | 1 (0.70, 1.43)            |                           |                           |
| Low Birthweight        |         |                                              |                           |                           |                           |
|                        | PFOA    | 1.58 (0.71, 3.54)                            | 1.32 (0.63, 2.75)         |                           |                           |
|                        | PFOS    | <b>2.55 (1.08, 6.03)</b>                     | 1.25 (0.63, 2.47)         |                           |                           |
|                        | PFHxS   | 1.33 (0.80, 2.23)                            | 0.97 (0.63, 1.5)          |                           |                           |

|         |                   |                   |
|---------|-------------------|-------------------|
| PFNA    | 1.35 (0.66, 2.75) | 1.05 (0.56, 1.97) |
| MeFOSAA | 0.87 (0.44, 1.7)  | 1.44 (0.87, 2.38) |
| EtFOSAA | 1.10 (0.66, 1.82) | 0.99 (0.62, 1.58) |

---

**Abbrev.** PFOA, perfluorooctanoic acid; PFOS, perfluorooctane sulfonic acid; PFHxS, perfluorohexane sulfonic acid; PFNA, perfluorononanoate; MeFOSAA, 2-(N-methyl-perfluorooctane sulfonamido) acetate; EtFOSAA, 2-(N-ethyl-perfluorooctane sulfonamido) acetate.

<sup>a</sup>: Models were adjusted for maternal age (continuous), education ( $\geq$  college graduate vs. not college graduate), race and ethnicity (White, Black, Hispanic, Asian, Other), BMI (continuous), smoking history (never, former, early pregnancy smoker), nulliparous (yes vs. no), breastfeeding history (yes vs. no), paternal education ( $\geq$  college graduate vs. not college graduate), annual household income ( $>$  vs.  $\leq$  \$70,000), infertility (yes vs. no), planned pregnancy (yes vs. no), infant sex (male vs. female), gestational age at recruitment (continuous), AHEI-P score in early pregnancy (continuous), and average fish consumption in early pregnancy (continuous).

**eTable 12. Differences (95% CI) in birthweight (grams) per doubling of early pregnancy plasma concentrations of per- and polyfluoroalkyl substances across quartile groups by early pregnancy dietary folate intake or plasma folate concentrations among mother-singleton pairs in Project Viva, using single-value imputation to account for missingness.**

| Chemical | Early Pregnancy Dietary Folate Intake |                           |                           |                           |
|----------|---------------------------------------|---------------------------|---------------------------|---------------------------|
|          | 1st Quartile                          | 2nd Quartile              | 3rd Quartile              | 4th Quartile              |
|          | Beta (95%CI) <sup>a</sup>             | Beta (95%CI) <sup>a</sup> | Beta (95%CI) <sup>a</sup> | Beta (95%CI) <sup>a</sup> |
| PFOA     | <b>-88.41 (-165.94, -10.88)</b>       | -30.78 (-116.67, 55.11)   | -31.44 (-112.66, 49.78)   | -1.58 (-80.53, 77.37)     |
| PFOS     | -36.76 (-106.39, 32.86)               | -57.95 (-138.38, 22.48)   | -73.62 (-153.49, 6.26)    | -53.25 (-137.74, 31.24)   |
| PFHxS    | 0.84 (-52.17, 53.85)                  | -30.77 (-88.83, 27.30)    | 1.32 (-46.79, 49.43)      | 8.69 (-45.55, 62.93)      |
| PFNA     | -25.08 (-94.66, 44.50)                | -56.36 (-132.08, 19.35)   | -43.12 (-118.29, 32.06)   | -50.83 (-129.12, 27.46)   |
| MeFOSAA  | 11.96 (-48.87, 72.79)                 | -16.28 (-73.38, 40.82)    | -1.37 (-66.04, 63.30)     | -51.53 (-111.66, 8.60)    |
| EtFOSAA  | 28.08 (-25.47, 81.63)                 | -16.25 (-66.81, 34.30)    | -24.3 (-76.36, 27.77)     | -21.28 (-77.11, 34.54)    |

  

| Chemical | Early Pregnancy Plasma Folate Concentrations |                           |                           |                           |
|----------|----------------------------------------------|---------------------------|---------------------------|---------------------------|
|          | 1st Quartile                                 | 2nd Quartile              | 3rd Quartile              | 4th Quartile              |
|          | Beta (95%CI) <sup>a</sup>                    | Beta (95%CI) <sup>a</sup> | Beta (95%CI) <sup>a</sup> | Beta (95%CI) <sup>a</sup> |
| PFOA     | <b>-88.53 (-181.46, 4.39)</b>                | 4.71 (-96.66, 106.08)     | -63.37 (-170.43, 43.69)   | -23.37 (-126.58, 79.84)   |
| PFOS     | <b>-100.57 (-199.43, -1.72)</b>              | -55.79 (-152.68, 41.11)   | -0.33 (-106.28, 105.62)   | -48.88 (-154.36, 56.60)   |
| PFHxS    | 9.70 (-57.14, 76.53)                         | -43.79 (-104.46, 16.88)   | 24.36 (-38.87, 87.58)     | -27.59 (-96.21, 41.02)    |
| PFNA     | <b>-88.65 (-184.08, 6.77)</b>                | -30.26 (-134.12, 73.59)   | 49.81 (-50.86, 150.48)    | -57.06 (-142.57, 28.45)   |
| MeFOSAA  | -60.51 (-141.29, 20.27)                      | -7.73 (-85.78, 70.33)     | -30.23 (-107.06, 46.60)   | 5.58 (-65.78, 76.95)      |
| EtFOSAA  | 14.27 (-47.36, 75.91)                        | -28.16 (-93.80, 37.47)    | -0.94 (-69.03, 67.15)     | -27.08 (-94.01, 39.84)    |

**Abbrev.** PFOA, perfluorooctanoic acid; PFOS, perfluorooctane sulfonic acid; PFHxS, perfluorohexane sulfonic acid; PFNA, perfluorononanoate; MeFOSAA, 2-(N-methyl-perfluorooctane sulfonamido) acetate; EtFOSAA, 2-(N-ethyl-perfluorooctane sulfonamido) acetate.

<sup>a</sup>: Models were adjusted for maternal age (continuous), education (≥ college graduate vs. not college graduate), race and ethnicity (White, Black, Hispanic, Asian, Other), BMI (continuous), smoking history (never, former, early pregnancy smoker), nulliparous (yes vs. no), breastfeeding history (yes vs. no), paternal education (≥ college graduate vs. not college graduate), annual household income (> vs. ≤ \$70,000), infertility (yes vs. no), planned pregnancy (yes vs. no), infant sex (male vs. female), gestational age at recruitment (continuous), and AHEI-P score in early pregnancy (continuous).



**eTable 13. Differences (95% CI) in birthweight z score per doubling of early pregnancy plasma concentrations of per- and polyfluoroalkyl substances across quartile groups by early pregnancy dietary folate intake or plasma folate concentrations among mother-singleton pairs in Project Viva, using single-value imputation to account for missingness.**

| Chemical | Early Pregnancy Dietary Folate Intake |                           |                           |                           |
|----------|---------------------------------------|---------------------------|---------------------------|---------------------------|
|          | 1st Quartile                          | 2nd Quartile              | 3rd Quartile              | 4th Quartile              |
|          | Beta (95%CI) <sup>a</sup>             | Beta (95%CI) <sup>a</sup> | Beta (95%CI) <sup>a</sup> | Beta (95%CI) <sup>a</sup> |
| PFOA     | <b>-0.13 (-0.26, -0.005)</b>          | -0.02 (-0.16, 0.12)       | -0.04 (-0.17, 0.10)       | -0.02 (-0.15, 0.12)       |
| PFOS     | -0.04 (-0.16, 0.08)                   | -0.07 (-0.20, 0.07)       | -0.11 (-0.25, 0.02)       | -0.06 (-0.20, 0.08)       |
| PFHxS    | 0.04 (-0.05, 0.13)                    | -0.03 (-0.13, 0.06)       | 0.01 (-0.07, 0.09)        | -0.01 (-0.10, 0.08)       |
| PFNA     | -0.01 (-0.13, 0.10)                   | -0.10 (-0.22, 0.03)       | -0.12 (-0.24, 0.01)       | -0.09 (-0.22, 0.04)       |
| MeFOSAA  | 0.01 (-0.09, 0.11)                    | -0.02 (-0.12, 0.07)       | -0.02 (-0.13, 0.09)       | -0.07 (-0.17, 0.03)       |
| EtFOSAA  | 0.04 (-0.04, 0.13)                    | -0.04 (-0.12, 0.05)       | -0.02 (-0.11, 0.07)       | -0.01 (-0.11, 0.08)       |

  

| Chemical | Early Pregnancy Plasma Folate Concentrations |                           |                           |                           |
|----------|----------------------------------------------|---------------------------|---------------------------|---------------------------|
|          | 1st Quartile                                 | 2nd Quartile              | 3rd Quartile              | 4th Quartile              |
|          | Beta (95%CI) <sup>a</sup>                    | Beta (95%CI) <sup>a</sup> | Beta (95%CI) <sup>a</sup> | Beta (95%CI) <sup>a</sup> |
| PFOA     | -0.14 (-0.30, 0.01)                          | 0.02 (-0.15, 0.20)        | -0.05 (-0.23, 0.13)       | -0.07 (-0.25, 0.10)       |
| PFOS     | -0.11 (-0.28, 0.05)                          | -0.09 (-0.25, 0.08)       | 0.03 (-0.15, 0.21)        | -0.10 (-0.28, 0.08)       |
| PFHxS    | 0.03 (-0.08, 0.15)                           | -0.08 (-0.19, 0.02)       | 0.04 (-0.06, 0.15)        | -0.05 (-0.17, 0.06)       |
| PFNA     | -0.08 (-0.24, 0.08)                          | -0.10 (-0.27, 0.08)       | 0.05 (-0.12, 0.22)        | -0.13 (-0.28, 0.01)       |
| MeFOSAA  | -0.09 (-0.23, 0.04)                          | 0.02 (-0.11, 0.15)        | 0 (-0.13, 0.13)           | -0.02 (-0.14, 0.10)       |
| EtFOSAA  | 0.03 (-0.07, 0.14)                           | -0.03 (-0.15, 0.08)       | 0 (-0.12, 0.11)           | -0.07 (-0.18, 0.05)       |

**Abbrev.** PFOA, perfluorooctanoic acid; PFOS, perfluorooctane sulfonic acid; PFHxS, perfluorohexane sulfonic acid; PFNA, perfluorononanoate; MeFOSAA, 2-(N-methyl-perfluorooctane sulfonamido) acetate; EtFOSAA, 2-(N-ethyl-perfluorooctane sulfonamido) acetate.

<sup>a</sup>: Models were adjusted for maternal age (continuous), education (≥ college graduate vs. not college graduate), race and ethnicity (White, Black, Hispanic, Asian, Other), BMI (continuous), smoking history (never, former, early pregnancy smoker), nulliparous (yes vs. no), breastfeeding history (yes vs. no), paternal education (≥ college graduate vs. not college graduate), annual household income (> vs. ≤ \$70,000), infertility (yes vs. no), planned pregnancy (yes vs. no), infant sex (male vs. female), gestational age at recruitment (continuous), and AHEI-P score in early pregnancy (continuous).

**eTable 14. Differences (95% CI) in gestational age (days) per doubling of early pregnancy plasma concentrations of per- and polyfluoroalkyl substances across quartile groups by early pregnancy dietary folate intake or plasma folate concentrations among mother-singleton pairs in Project Viva, using single-value imputation to account for missingness.**

| Chemical | Early Pregnancy Dietary Folate Intake |                           |                           |                           |
|----------|---------------------------------------|---------------------------|---------------------------|---------------------------|
|          | 1st Quartile                          | 2nd Quartile              | 3rd Quartile              | 4th Quartile              |
|          | Beta (95%CI) <sup>a</sup>             | Beta (95%CI) <sup>a</sup> | Beta (95%CI) <sup>a</sup> | Beta (95%CI) <sup>a</sup> |
| PFOA     | -1.26 (-3.07, 0.55)                   | -0.79 (-2.8, 1.21)        | -0.53 (-2.43, 1.37)       | 0.39 (-1.45, 2.24)        |
| PFOS     | -1.42 (-3.04, 0.21)                   | -1.22 (-3.1, 0.66)        | -0.88 (-2.75, 0.98)       | -0.76 (-2.73, 1.22)       |
| PFHxS    | -0.93 (-2.17, 0.30)                   | -0.45 (-1.8, 0.9)         | 0.12 (-1, 1.24)           | 0.63 (-0.64, 1.9)         |
| PFNA     | -0.87 (-2.49, 0.76)                   | -0.08 (-1.85, 1.69)       | 0.37 (-1.39, 2.13)        | -0.03 (-1.86, 1.8)        |
| MeFOSAA  | 0.03 (-1.39, 1.45)                    | -0.05 (-1.38, 1.29)       | 0.47 (-1.04, 1.98)        | -0.81 (-2.22, 0.59)       |
| EtFOSAA  | 0.33 (-0.92, 1.58)                    | 0 (-1.18, 1.18)           | -0.44 (-1.66, 0.78)       | -0.71 (-2.02, 0.59)       |

  

| Chemical | Early Pregnancy Plasma Folate Concentrations |                           |                           |                           |
|----------|----------------------------------------------|---------------------------|---------------------------|---------------------------|
|          | 1st Quartile                                 | 2nd Quartile              | 3rd Quartile              | 4th Quartile              |
|          | Beta (95%CI) <sup>a</sup>                    | Beta (95%CI) <sup>a</sup> | Beta (95%CI) <sup>a</sup> | Beta (95%CI) <sup>a</sup> |
| PFOA     | -1.00 (-3.14, 1.14)                          | -0.07 (-2.41, 2.27)       | -1.50 (-3.97, 0.97)       | 0.02 (-2.36, 2.40)        |
| PFOS     | -2.02 (-4.3, 0.26)                           | -0.41 (-2.65, 1.82)       | -0.91 (-3.35, 1.53)       | -0.76 (-3.19, 1.67)       |
| PFHxS    | 0.09 (-1.45, 1.63)                           | 0.05 (-1.34, 1.45)        | 0.47 (-0.99, 1.92)        | -0.35 (-1.94, 1.23)       |
| PFNA     | <b>-2.25 (-4.45, -0.06)</b>                  | 0.70 (-1.70, 3.09)        | 1.02 (-1.30, 3.33)        | -0.02 (-1.99, 1.95)       |
| MeFOSAA  | -1.08 (-2.94, 0.78)                          | -0.75 (-2.55, 1.04)       | -0.79 (-2.56, 0.97)       | 0.38 (-1.26, 2.03)        |
| EtFOSAA  | -0.10 (-1.52, 1.32)                          | -0.63 (-2.14, 0.89)       | -0.19 (-1.76, 1.38)       | 0.30 (-1.24, 1.85)        |

**Abbrev.** PFOA, perfluorooctanoic acid; PFOS, perfluorooctane sulfonic acid; PFHxS, perfluorohexane sulfonic acid; PFNA, perfluorononanoate; MeFOSAA, 2-(N-methyl-perfluorooctane sulfonamido) acetate; EtFOSAA, 2-(N-ethyl-perfluorooctane sulfonamido) acetate.

<sup>a</sup>: Models were adjusted for maternal age (continuous), education (≥ college graduate vs. not college graduate), race and ethnicity (White, Black, Hispanic, Asian, Other), BMI (continuous), smoking history (never, former, early pregnancy smoker), nulliparous (yes vs. no), breastfeeding history (yes vs. no), paternal education (≥ college graduate vs. not college graduate), annual household income (> vs. ≤ \$70,000), infertility (yes vs. no), planned pregnancy (yes vs. no), infant sex (male vs. female), gestational age at recruitment (continuous), and AHEI-P score in early pregnancy (continuous).

**eTable 15. Odds Ratios (95% CI) for low birthweight per doubling of early pregnancy plasma concentrations of per- and polyfluoroalkyl substances across quartile groups by early pregnancy dietary folate intake or plasma folate concentrations among mother-singleton pairs in Project Viva, using single-value imputation to account for missingness.**

| Chemical | Early Pregnancy Dietary Folate Intake        |                         |
|----------|----------------------------------------------|-------------------------|
|          | 1st Quartile                                 | 2nd – 4th Quartile      |
|          | OR (95%CI) <sup>a</sup>                      | OR (95%CI) <sup>a</sup> |
| PFOA     | 1.56 (0.78, 3.08)                            | 1.10 (0.69, 1.76)       |
| PFOS     | 1.60 (0.83, 3.1)                             | 1.41 (0.91, 2.19)       |
| PFHxS    | 1.22 (0.79, 1.9)                             | 1 (0.75, 1.32)          |
| PFNA     | 1.18 (0.66, 2.1)                             | 1.39 (0.89, 2.17)       |
| MeFOSAA  | 0.85 (0.53, 1.38)                            | 1.26 (0.90, 1.77)       |
| EtFOSAA  | 1.04 (0.67, 1.62)                            | 1.02 (0.77, 1.36)       |
| Chemical | Early Pregnancy Plasma Folate Concentrations |                         |
|          | 1st Quartile                                 | 2nd – 4th Quartile      |
|          | OR (95%CI) <sup>a</sup>                      | OR (95%CI) <sup>a</sup> |
| PFOA     | 1.65 (0.74, 3.66)                            | 1.28 (0.62, 2.62)       |
| PFOS     | <b>2.57 (1.08, 6.10)</b>                     | 1.13 (0.59, 2.19)       |
| PFHxS    | 1.34 (0.81, 2.21)                            | 0.95 (0.62, 1.45)       |
| PFNA     | 1.34 (0.64, 2.79)                            | 0.99 (0.54, 1.83)       |
| MeFOSAA  | 0.87 (0.44, 1.71)                            | 1.45 (0.89, 2.37)       |
| EtFOSAA  | 1.12 (0.68, 1.84)                            | 0.96 (0.60, 1.52)       |

**Abbrev.** PFOA, perfluorooctanoic acid; PFOS, perfluorooctane sulfonic acid; PFHxS, perfluorohexane sulfonic acid; PFNA, perfluorononanoate; MeFOSAA, 2-(N-methyl-perfluorooctane sulfonamido) acetate; EtFOSAA, 2-(N-ethyl-perfluorooctane sulfonamido) acetate.

<sup>a</sup>: Models were adjusted for maternal age (continuous), education (≥ college graduate vs. not college graduate), race and ethnicity (White, Black, Hispanic, Asian, Other), BMI (continuous), smoking history (never, former, early pregnancy smoker), nulliparous (yes vs. no), breastfeeding history (yes vs. no), paternal education (≥ college graduate vs. not college graduate), annual household income (> vs. ≤ \$70,000), infertility (yes vs. no), planned pregnancy (yes vs. no), infant sex (male vs. female), gestational age at recruitment (continuous), and AHEI-P score in early pregnancy (continuous).

**eTable 16. Odds Ratios (95% CI) for preterm birth per doubling of early pregnancy plasma concentrations of per- and polyfluoroalkyl substances across quartile groups by early pregnancy dietary folate intake or plasma folate concentrations among mother-singleton pairs in Project Viva, using single-value imputation to account for missingness.**

| Chemical | Early Pregnancy Dietary Folate Intake        |                         |
|----------|----------------------------------------------|-------------------------|
|          | 1st Quartile                                 | 2nd – 4th Quartile      |
|          | OR (95%CI) <sup>a</sup>                      | OR (95%CI) <sup>a</sup> |
| PFOA     | 1.30 (0.75, 2.23)                            | 0.99 (0.68, 1.45)       |
| PFOS     | 1.53 (0.91, 2.58)                            | 1.13 (0.79, 1.61)       |
| PFHxS    | 1.19 (0.83, 1.69)                            | 1.08 (0.85, 1.36)       |
| PFNA     | 1.35 (0.83, 2.2)                             | 1.05 (0.74, 1.48)       |
| MeFOSAA  | 0.90 (0.60, 1.33)                            | 1.11 (0.85, 1.46)       |
| EtFOSAA  | 1.14 (0.80, 1.62)                            | 1.00 (0.79, 1.26)       |
| Chemical | Early Pregnancy Plasma Folate Concentrations |                         |
|          | 1st Quartile                                 | 2nd – 4th Quartile      |
|          | OR (95%CI) <sup>a</sup>                      | OR (95%CI) <sup>a</sup> |
| PFOA     | 1.16 (0.63, 2.13)                            | 1.17 (0.66, 2.06)       |
| PFOS     | 1.54 (0.82, 2.91)                            | 1.16 (0.69, 1.95)       |
| PFHxS    | 1.04 (0.68, 1.58)                            | 0.95 (0.69, 1.31)       |
| PFNA     | 1.39 (0.75, 2.58)                            | 0.86 (0.53, 1.40)       |
| MeFOSAA  | 1.44 (0.84, 2.49)                            | 1.19 (0.81, 1.76)       |
| EtFOSAA  | 1.16 (0.79, 1.72)                            | 0.99 (0.70, 1.41)       |

**Abbrev.** PFOA, perfluorooctanoic acid; PFOS, perfluorooctane sulfonic acid; PFHxS, perfluorohexane sulfonic acid; PFNA, perfluorononanoate; MeFOSAA, 2-(N-methyl-perfluorooctane sulfonamido) acetate; EtFOSAA, 2-(N-ethyl-perfluorooctane sulfonamido) acetate.

<sup>a</sup>: Models were adjusted for maternal age (continuous), education ( $\geq$  college graduate vs. not college graduate), race and ethnicity (White, Black, Hispanic, Asian, Other), BMI (continuous), smoking history (never, former, early pregnancy smoker), nulliparous (yes vs. no), breastfeeding history (yes vs. no), paternal education ( $\geq$  college graduate vs. not college graduate), annual household income ( $>$  vs.  $\leq$  \$70,000), infertility (yes vs. no), planned pregnancy (yes vs. no), infant sex (male vs. female), gestational age at recruitment (continuous), and AHEI-P score in early pregnancy (continuous).

**eFigure 1. Participants' inclusion diagram of mother-singleton pairs in Project Viva.**

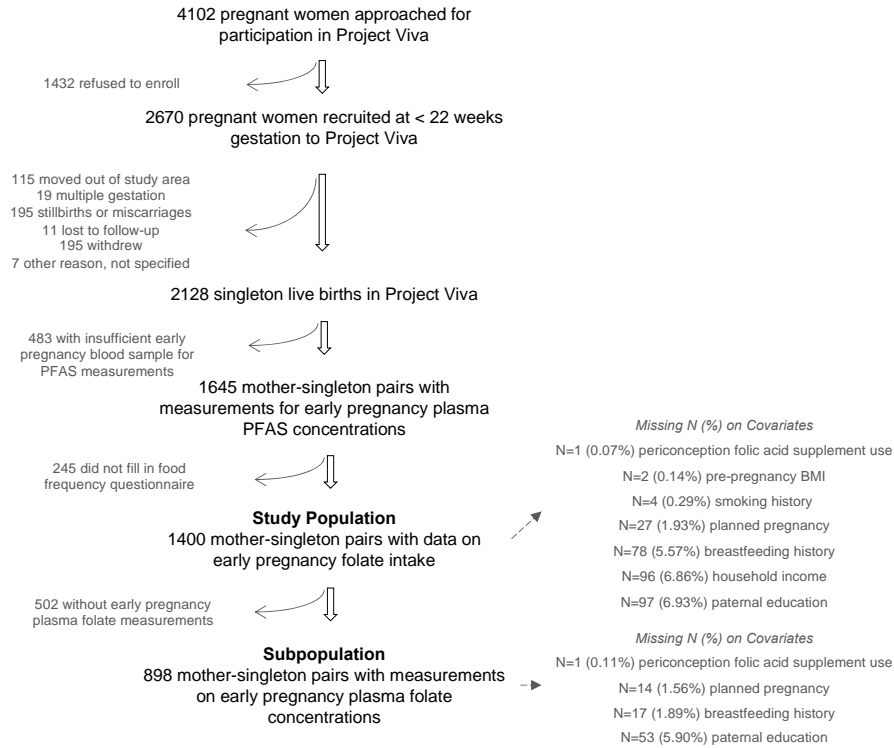

**Abbrev.** PFAS, per- and polyfluoroalkyl substances; BMI, body mass index.

**eFigure 2. Directed Acyclic Graph under the null hypothesis of PFAS-birth outcome associations.**

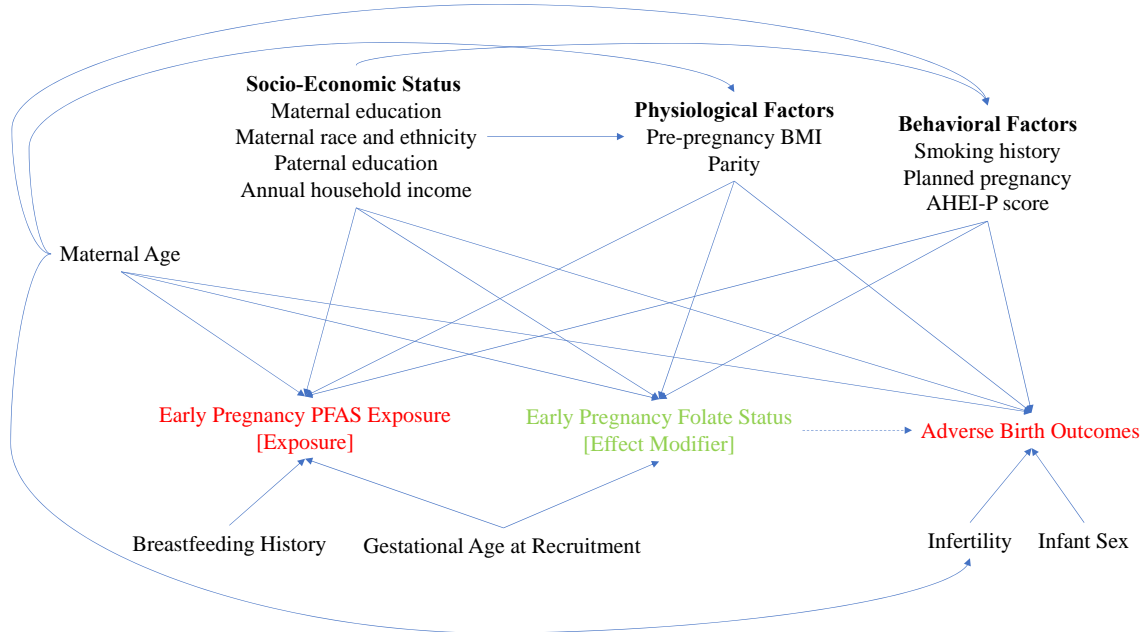

**Abbrev.** PFAS, per- and polyfluoroalkyl substances; BMI, body mass index; AHEI-P, alternative healthy eating index score in pregnancy.

**eFigure 3. Spearman correlation coefficient matrix for early pregnancy dietary folate intake and plasma concentrations of per- and polyfluoroalkyl substances and folate among mother-singleton pairs in Project Viva.**

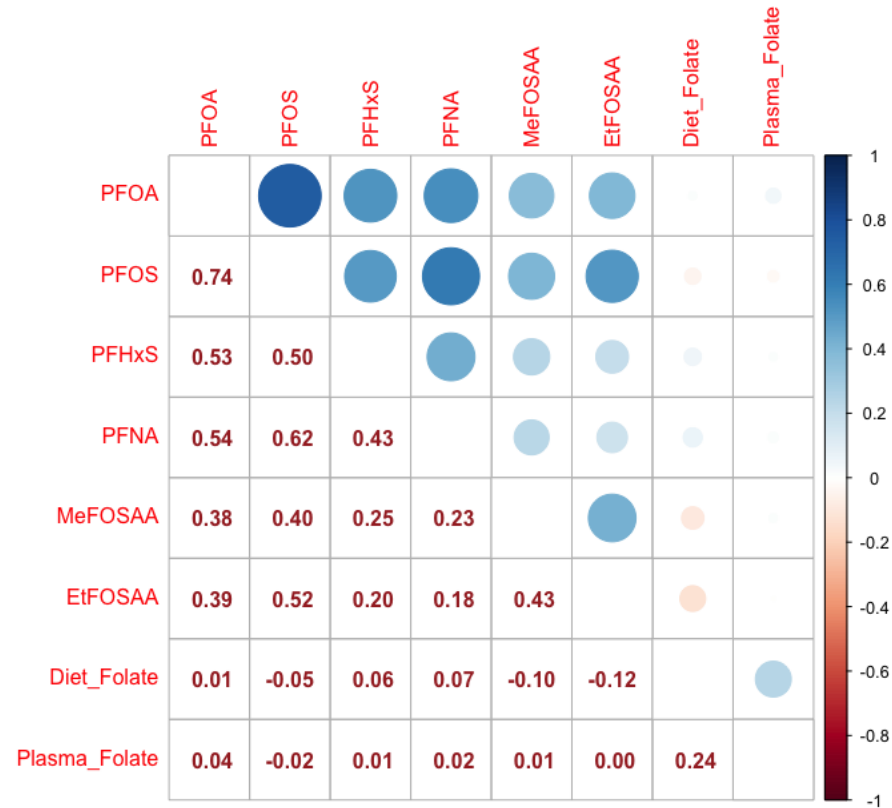

**Abbrev.** PFOA, perfluorooctanoic acid; PFOS, perfluorooctane sulfonic acid; PFHxS, perfluorohexane sulfonic acid; PFNA, perfluorononanoate; MeFOSAA, 2-(N-methyl-perfluorooctane sulfonamido) acetate; EtFOSAA, 2-(N-ethyl-perfluorooctane sulfonamido) acetate.

**eFigure 4. Changes in the beta coefficients for the relationships between log<sub>2</sub> transformed plasma concentrations of per- and polyfluoroalkyl substances with birthweight across early pregnancy dietary folate equivalent intake.**

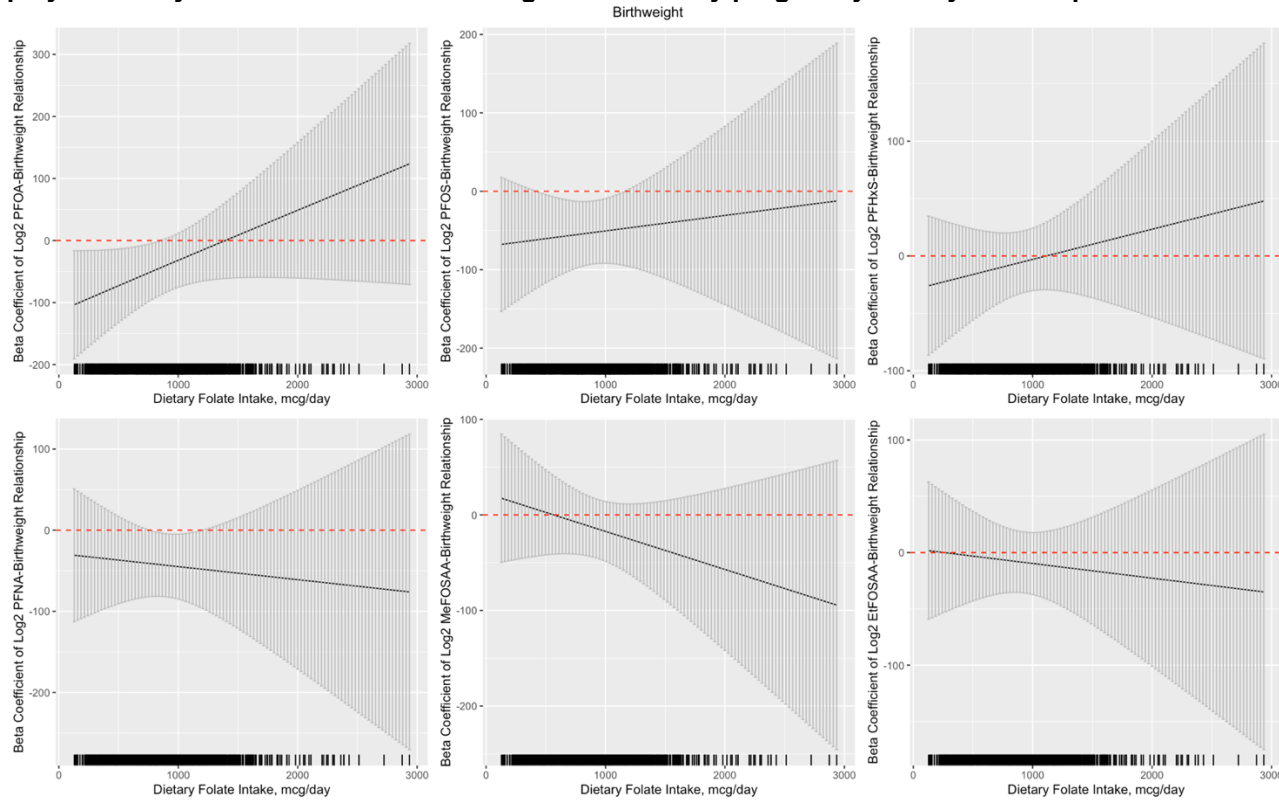

**Abbrev.** PFOA, perfluorooctanoic acid; PFOS, perfluorooctane sulfonic acid; PFHxS, perfluorohexane sulfonic acid; PFNA, perfluorononanoate; MeFOSAA, 2-(N-methyl-perfluorooctane sulfonamido) acetate; EtFOSAA, 2-(N-ethyl-perfluorooctane sulfonamido) acetate.

Note. N=2 outliers were excluded in the analyses with dietary folate equivalent intake > 3000 mcg/day.



**eFigure 5. Changes in the beta coefficients for the relationships between log-2 transformed plasma concentrations of per- and polyfluoroalkyl substances with birthweight across early pregnancy plasma folate concentrations.**

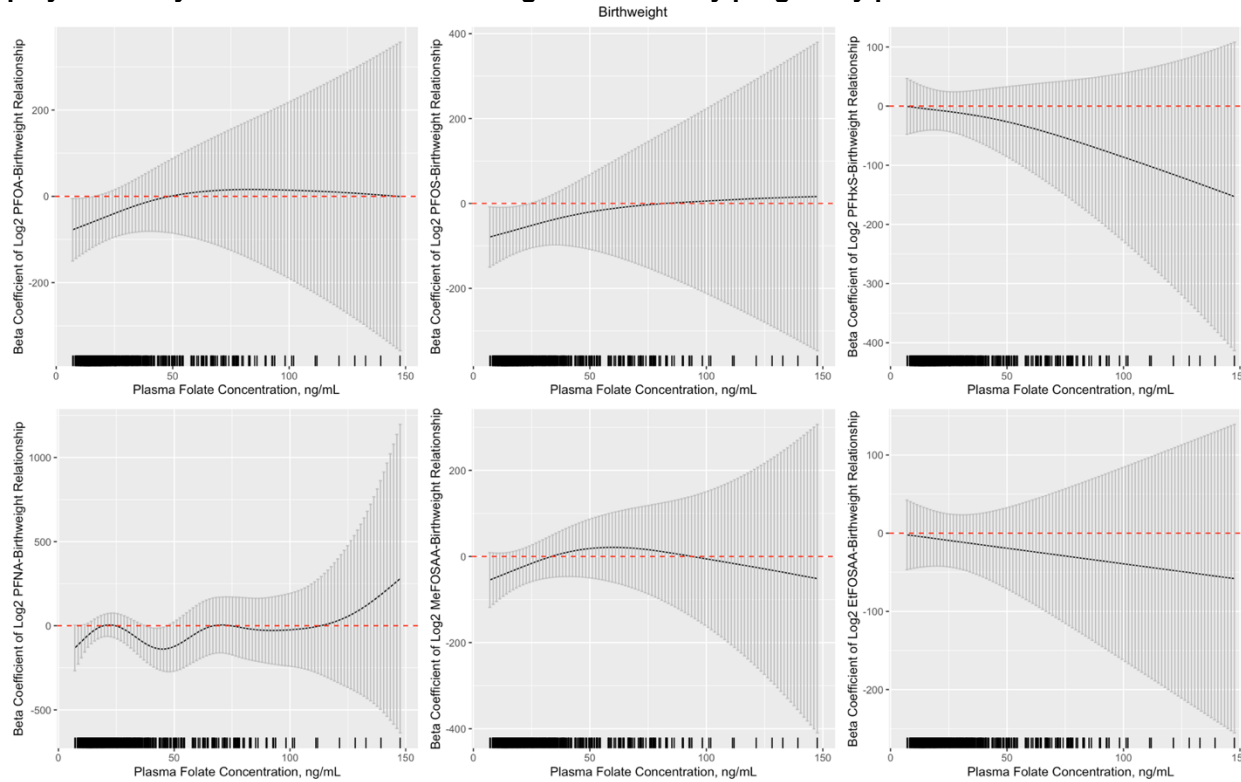

**Abbrev.** PFOA, perfluorooctanoic acid; PFOS, perfluorooctane sulfonic acid; PFHxS, perfluorohexane sulfonic acid; PFNA, perfluorononanoate; MeFOSAA, 2-(N-methyl-perfluorooctane sulfonamido) acetate; EtFOSAA, 2-(N-ethyl-perfluorooctane sulfonamido) acetate.

Note. N=3 outliers were excluded in the analyses with plasma folate concentrations > 150 ng/mL.

**eFigure 6. Changes in the beta coefficients for the relationships between log-2 transformed plasma concentrations of per- and polyfluoroalkyl substances with birthweight z score across early pregnancy dietary folate equivalent intake.**

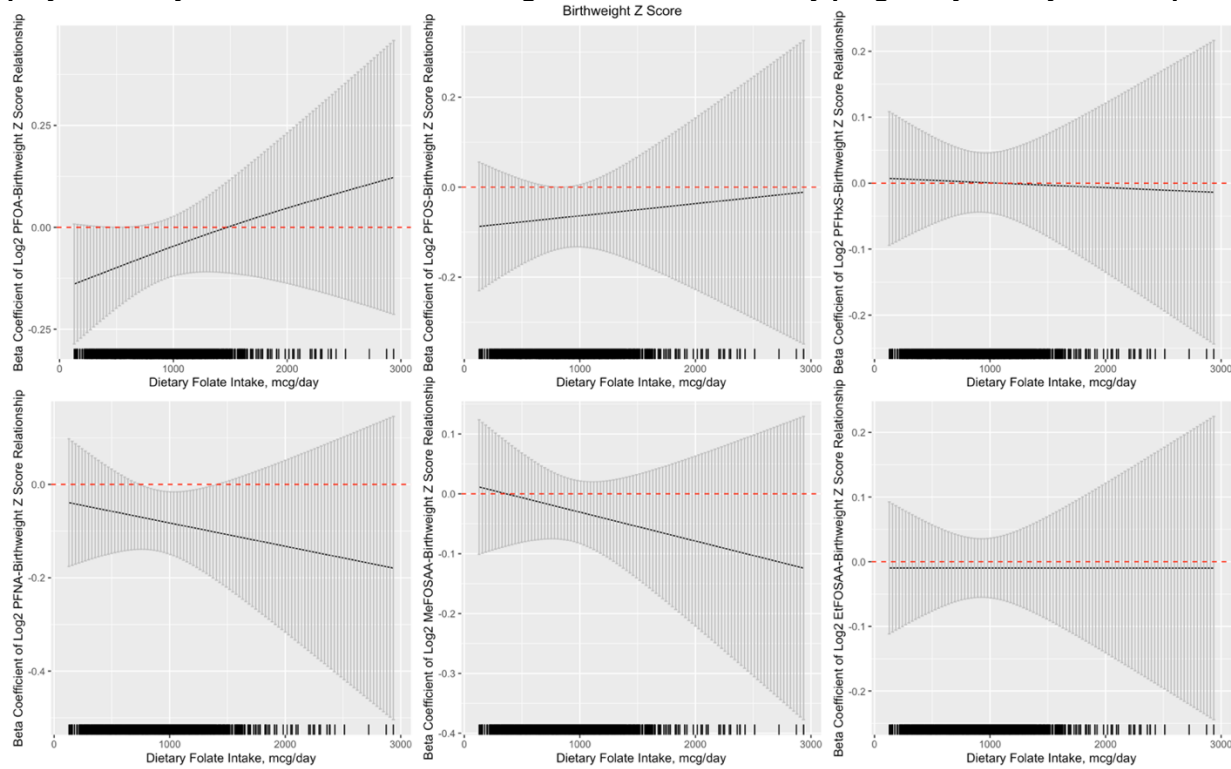

**Abbrev.** PFOA, perfluorooctanoic acid; PFOS, perfluorooctane sulfonic acid; PFHxS, perfluorohexane sulfonic acid; PFNA, perfluorononanoate; MeFOSAA, 2-(N-methyl-perfluorooctane sulfonamido) acetate; EtFOSAA, 2-(N-ethyl-perfluorooctane sulfonamido) acetate.  
**Note.** N=2 outliers were excluded in the analyses with dietary folate equivalent intake > 3000 mcg/day.

**eFigure 7. Changes in the beta coefficients for the relationships between log-2 transformed plasma concentrations of per- and polyfluoroalkyl substances with birthweight z score across early pregnancy plasma folate concentrations.**

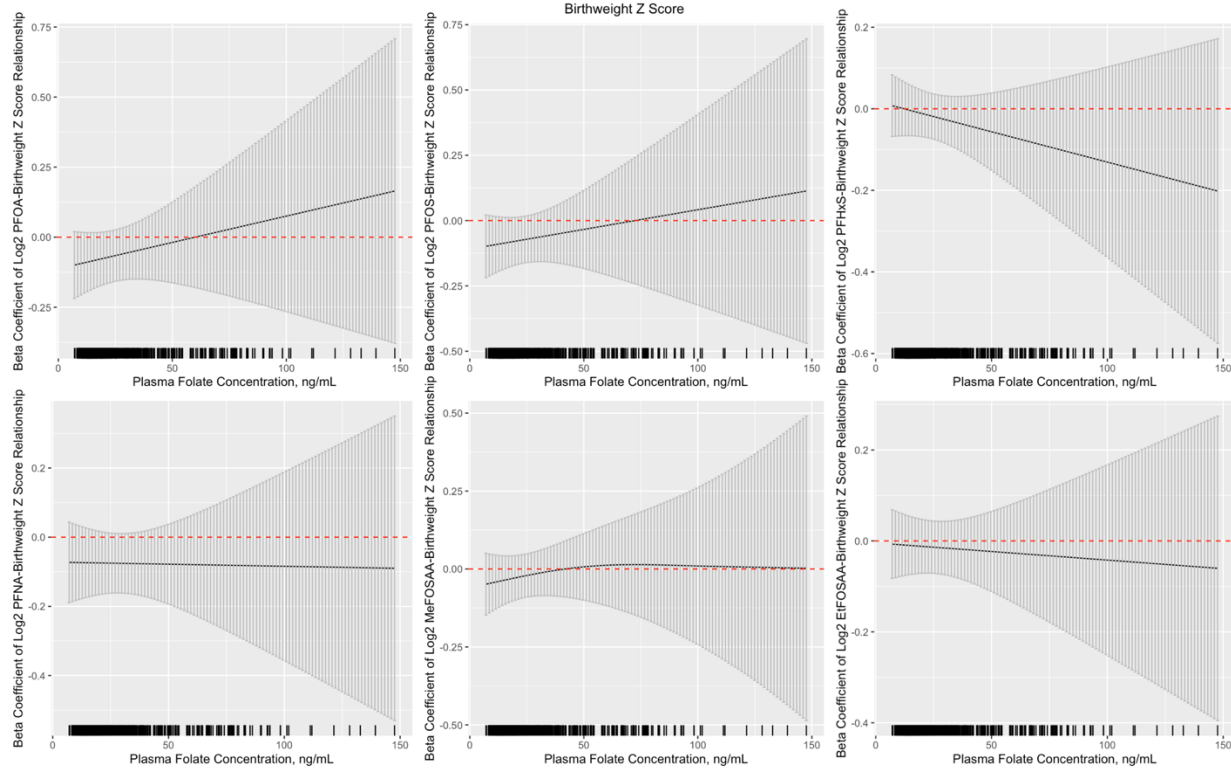

**Abbrev.** PFOA, perfluorooctanoic acid; PFOS, perfluorooctane sulfonic acid; PFHxS, perfluorohexane sulfonic acid; PFNA, perfluorononanoate; MeFOSAA, 2-(N-methyl-perfluorooctane sulfonamido) acetate; EtFOSAA, 2-(N-ethyl-perfluorooctane sulfonamido) acetate.  
 Note. N=3 outliers were excluded in the analyses with plasma folate concentrations > 150 ng/mL.

**eFigure 8. Changes in log (odds ratio) for low birthweight in relation to log-2 transformed plasma concentrations of per- and polyfluoroalkyl substances across early pregnancy plasma folate concentrations.**

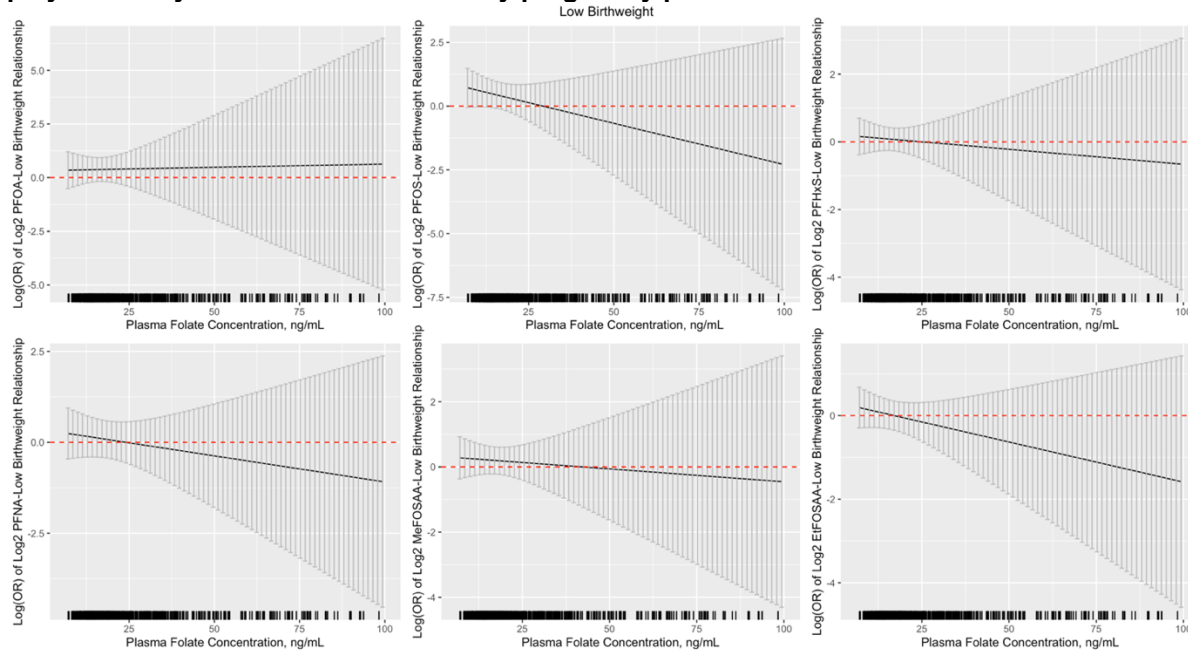

**Abbrev.** PFOA, perfluorooctanoic acid; PFOS, perfluorooctane sulfonic acid; PFHxS, perfluorohexane sulfonic acid; PFNA, perfluorononanoate; MeFOSAA, 2-(N-methyl-perfluorooctane sulfonamido) acetate; EtFOSAA, 2-(N-ethyl-perfluorooctane sulfonamido) acetate.

Note. N=3 outliers were excluded in the analyses with plasma folate concentrations > 150 ng/mL. Because of the large 95% CI confidence interval at high plasma folate concentrations due to sparse data, the figure only presented results at plasma folate concentrations < 100 ng/mL.

**eFigure 9. Changes in the beta coefficients for the relationships between log-2 transformed plasma concentrations of per- and polyfluoroalkyl substances with gestational age across early pregnancy plasma folate concentrations.**

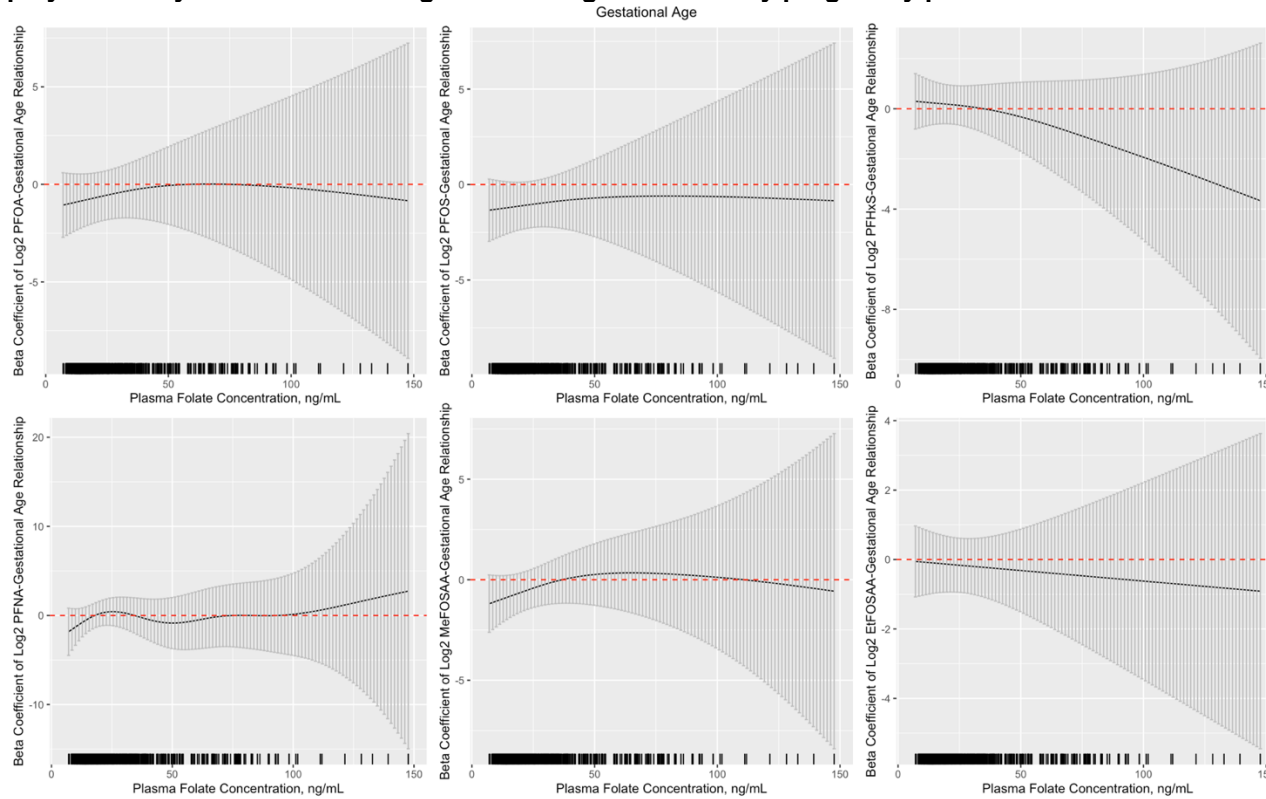

**Abbrev.** PFOA, perfluorooctanoic acid; PFOS, perfluorooctane sulfonic acid; PFHxS, perfluorohexane sulfonic acid; PFNA, perfluorononanoate; MeFOSAA, 2-(N-methyl-perfluorooctane sulfonamido) acetate; EtFOSAA, 2-(N-ethyl-perfluorooctane sulfonamido) acetate.

Note. N=3 outliers were excluded in the analyses with plasma folate concentrations > 150 ng/mL.

## **eMethods. Details on Analyses and Models**

### **Analyses on preterm birth and low birthweight.**

Secondary analyses were performed to assess the risks of preterm birth and low birthweight in relation to early pregnancy plasma PFAS concentrations across folate groups. Because of the low incidence of preterm birth (7.1%) and low birthweight (4.6%) in the study population and thus to preserve power in our analyses with the small number of cases, we dichotomized the sample into 1) below vs. above the lowest quartile of early pregnancy DFE intake; or 2) below vs. above the lowest quartile of plasma folate concentrations (in the subpopulation where plasma folate was quantified). These cut-points were informed *post-hoc* from associations with the continuous birth outcomes. We used logistic regression models as well as QGC to obtain the adjusted odds ratios (ORs) for preterm birth and low birthweight per doubling of plasma PFAS concentrations in the folate groups, adjusting for the above-mentioned covariates.

### **Generalized additive models.**

As a complementary analysis, we additionally utilized generalized additive model (GAM) to explore the non-linear effect modification by folate (as DFE or plasma folate) on the relationship between individual PFAS compounds and each birth outcome. To simplify these analyses, we assumed a linear relationship between the log-2 transformed plasma PFAS concentration and birth outcomes. The GAM models allowed the beta coefficients of the linear PFAS-birth outcome associations to vary smoothly across the two continuous folate measures (DFE or plasma folate).

## **eResults. Details on Comparisons and Models**

### **Comparisons of study population, subpopulation, with the original Project Viva cohort.**

Compared with mothers of the total Project Viva cohort (N=2128), the study population (N=1400) and the subpopulation (N=898) included in the current analyses were slightly more likely to be White, have a college degree or higher, have annual household income > \$70,000, plan for the index pregnancy, and report periconception folic acid supplement use, though the magnitudes of differences were small (eTable 1).

### **Results of generalized additive models.**

The GAM models showed consistency in effect modification by folate status with findings from primary analyses in general. Specifically, the associations between PFAS and birth outcomes reported in the primary analyses [i.e., PFOA-lower birthweight (eFigures 4&5) and birthweight z score (eFigures 6&7), PFOS-lower birthweight (eFigure 5) and higher odds of low birthweight (eFigure 8)] were only present when DFE intake or plasma folate concentrations were low, but the associations became null as folate levels increased. The cut-offs of DFE or plasma folate concentration where the PFAS-birth outcome relationships changed to null were in general similar or higher than the lowest quartile levels. However, with GAM, we did not find effect modification by plasma folate on PFNA-birthweight (eFigure 5), and PFNA-gestational age (eFigure 9) relationships in contrast to primary analyses.
