# Supplementary material for: Association of Early Pregnancy Perfluoroalkyl and Polyfluoroalkyl Substance Exposure With Birth Outcomes
Source: PubMed Central journal article supplement (PMC10233420; doi:10.1001/jamanetworkopen.2023.14934), 2023-05-31
Supplement: jamanetwopen-e2314934-s002.pdf [file jamanetwopen-e2314934-s002.pdf]

## Data Sharing Statement

Zhang. Association of Early Pregnancy Perfluoroalkyl and Polyfluoroalkyl Substance Exposure With Birth Outcomes. *JAMA Netw Open*. Published May 31, 2023.

doi:10.1001/jamanetworkopen.2023.14934

### Data

**Data available:** No

### Additional Information

**Explanation for why data not available:** Data are available from the corresponding author upon reasonable request.
